# Supplementary material for: Achieving absolute sustainability across integrated industrial networks – a case study on the ammonia process
Source: Royal Society of Chemistry journal article supplement (doi:10.1039/d0gc02520h), 2020-01-01
Supplement: d0gc02520h1.pdf [file d0gc02520h1.pdf]

## **Achieving Absolute Sustainability Across Integrated Industrial Networks- A Case Study on the Ammonia Process†.**

**Nicholas Samaroo<sup>a</sup>, Natalia Koynass<sup>a</sup>, Miao Guo<sup>\*b</sup>, and Keeran Ward<sup>\*a</sup>**

<sup>a</sup>Department of Chemical Engineering, University of the West Indies, St. Augustine, Trinidad and Tobago.

<sup>b</sup>Department of Engineering, King's College London, Strand Campus, United Kingdom, WC2R 2LS

Telephone: 1-868-730-1980; [keeran.ward@sta.uwi.edu](mailto:keeran.ward@sta.uwi.edu)\*; +44 (0) 7726 479669; [miao.guo@kcl.ac.uk](mailto:miao.guo@kcl.ac.uk)\*

**Electronic Supplementary Information (ESI)†**

## 1.0 Mass and Energy Balances

*Table S1* below gives the plant efficiencies for viable pathways considered in the NH<sub>3</sub> - CO<sub>2</sub> integrated eco-park. Using **Equation 1 (main article)**, plant efficiencies were calculated from the input (natural gas fuel, feedstock and electricity) and output (NH<sub>3</sub>, Urea, UAN, Mel, MeOH and purge gas fuel) flows.

**Table S1: Summary of mass and energy balances for the production of 1 kg of NH<sub>3</sub> across eco-park design**

|                         | Unit <sup>b</sup>       | BAU    | BAU + Urea<br>+ MeOH | BAU + Urea | BAU + Urea<br>+ UAN +<br>MeOH | BAU + Urea<br>+ UAN | BAU + Urea<br>+ Mel +<br>MeOH | BAU + Urea<br>+ Mel | BAU + Urea<br>+ UAN +<br>Mel +<br>MeOH | BAU + Urea<br>+ UAN +<br>Mel |
|-------------------------|-------------------------|--------|----------------------|------------|-------------------------------|---------------------|-------------------------------|---------------------|----------------------------------------|------------------------------|
| <b>INPUTS</b>           |                         |        |                      |            |                               |                     |                               |                     |                                        |                              |
| Natural gas (fuel)      | kg                      | 0.34   | 1.81                 | 0.87       | 10.18                         | 4.81                | 1.81                          | 0.88                | 10.22                                  | 4.92                         |
| Natural gas (fuel)      | MJ <sup>a</sup>         | 16.90  | 89.10                | 43.15      | 87.02                         | 41.08               | 89.45                         | 43.51               | 87.37                                  | 42.03                        |
| Natural gas (feedstock) | kg                      | 0.63   | 3.57                 | 1.14       | 20.58                         | 6.61                | 3.57                          | 1.14                | 20.58                                  | 6.61                         |
| Natural gas (feedstock) | MJ <sup>a</sup>         | 31.17  | 175.91               | 56.47      | 175.91                        | 56.47               | 175.91                        | 56.47               | 175.91                                 | 56.47                        |
| Process Water           | kg                      | 0.88   | 5.34                 | 2.41       | 49.48                         | 32.55               | 6.40                          | 3.46                | 55.59                                  | 38.65                        |
| Electricity demand      | MW x<br>10 <sup>3</sup> | 0.02   | 0.69                 | 0.55       | 4.35                          | 3.54                | 0.75                          | 0.61                | 4.69                                   | 3.88                         |
| <b>TOTAL Duty</b>       | <b>MJ</b>               | 48.13  | 267.51               | 101.62     | 265.65                        | 99.76               | 268.07                        | 102.18              | 266.21                                 | 100.93                       |
| <b>OUTPUTS</b>          |                         |        |                      |            |                               |                     |                               |                     |                                        |                              |
| Ammonia                 | kg                      | 1.00   | 1.00                 | 1.00       | 1.00                          | 1.00                | 1.00                          | 1.00                | 1.00                                   | 1.00                         |
|                         | MJ <sup>a</sup>         | 18.60  | 18.60                | 18.60      | 3.22                          | 3.22                | 18.60                         | 18.60               | 3.22                                   | 3.22                         |
| Purge gas               | kg                      | 0.14   | 1.40                 | 0.26       | 8.07                          | 1.50                | 1.40                          | 0.26                | 8.07                                   | 1.50                         |
|                         | MJ <sup>a</sup>         | 1.02   | 30.84                | 1.85       | 30.84                         | 1.85                | 30.84                         | 1.85                | 30.84                                  | 1.85                         |
| UAN                     | kg                      | 0.00   | 0.00                 | 0.00       | 24.45                         | 24.45               | 0.00                          | 0.00                | 24.45                                  | 24.45                        |
|                         | MJ <sup>a</sup>         | 0.00   | 0.00                 | 0.00       | 23.05                         | 23.05               | 0.00                          | 0.00                | 23.05                                  | 23.05                        |
| Melamine                | kg                      | 0.00   | 0.00                 | 0.00       | 0.00                          | 0.00                | 0.18                          | 0.18                | 1.02                                   | 1.02                         |
|                         | MJ <sup>a</sup>         | 0.00   | 0.00                 | 0.00       | 0.00                          | 0.00                | 0.15                          | 0.15                | 0.15                                   | 0.15                         |
| Process CO <sub>2</sub> | kg                      | 1.23   | 0.00                 | 1.01       | 0.00                          | 5.81                | 0.00                          | 1.01                | 0.00                                   | 5.81                         |
|                         | MJ                      | 0.00   | 0.00                 | 0.00       | 0.00                          | 0.00                | 0.00                          | 0.00                | 0.00                                   | 0.00                         |
| Urea                    | kg                      | 0.00   | 1.63                 | 1.63       | 0.00                          | 0.00                | 1.39                          | 1.39                | 0.00                                   | 0.00                         |
|                         | MJ <sup>a</sup>         | 0.00   | 8.50                 | 8.50       | 0.00                          | 0.00                | 7.23                          | 7.23                | 0.00                                   | 0.00                         |
| MeOH                    | kg                      | 0.00   | 4.92                 | 0.00       | 28.41                         | 0.00                | 4.92                          | 0.00                | 28.41                                  | 0.00                         |
|                         | MJ <sup>a</sup>         | 0.00   | 98.05                | 0.00       | 98.05                         | 0.00                | 98.05                         | 0.00                | 98.05                                  | 0.00                         |
| <b>TOTAL DUTY</b>       | <b>MJ</b>               | 19.62  | 155.99               | 28.96      | 155.16                        | 28.12               | 154.87                        | 27.83               | 155.32                                 | 28.28                        |
| <b>Efficiency</b>       | <b>%</b>                | 40.77% | 58.31%               | 28.49%     | 58.41%                        | 28.19%              | 57.77%                        | 27.24%              | 58.34%                                 | 28.02%                       |

<sup>a</sup>Energy load calculated using the net heating value estimated from Aspen Plus.

## 2.0 Economic Analysis

### 2.1 Total Capital Investment (TCI)

For each process considered within the integrated eco-park, the total capital cost was evaluated from current process data<sup>1-5</sup> and scaled to capacity using the six-tenths rule<sup>6</sup> and inflated using the Chemical Engineering Plant Cost Indices (CEPCI)<sup>7-10</sup> (Eq.1-2). All costs were scaled to 2019 using CEPCI.

$$C_B = C_A \left( \frac{S_B}{S_A} \right)^{0.6} \quad (1)$$

$$C_2 = C_A \left( \frac{S_B}{S_A} \right)^{0.6} \times \frac{I_2}{I_1} \quad (2)$$

Where  $C_{A, B}$  is the TCI for plant A and B respectively,  $S_{A, B}$  is the capacity for plants A and B respectively,  $C_2$  is the actual TCI for desired process,  $I_{1, 2}$  are the CEPCI for the base year for the known process and the year desired respectively.

### 2.2 Fixed Capital Investment (FCI)

FCI was given as a function of the TCI and the working capital (WC), which was taken to be 15% of the FCI<sup>11</sup> by Eq. 3-4. Table S2 gives the FCI for each viable pathway considered.

$$FCI = TCI - WC \quad (3)$$

$$FCI = \frac{TCI}{1.15} \quad (4)$$

**Table S2: Overview of parameters used to calculate FCI for each scenario**

| Process                    | Existing Process TCI, $C_A$ [SMM US] | Existing Plant Capacity, $S_A$ [tonne/day] | Actual Plant Capacity, $S_B$ [tonne/day] | Base Process TCI, $C_B$ [SMM US] | CEPCI Base Year, $I_1$ | CEPCI 2019, $I_2$ | Actual Process TCI, $C_2$ [SMM US] | FCI [SMM US] |
|----------------------------|--------------------------------------|--------------------------------------------|------------------------------------------|----------------------------------|------------------------|-------------------|------------------------------------|--------------|
| Ammonia (BAU) <sup>2</sup> | 665                                  | 1220                                       | 1850                                     | 853.7                            | 558.3                  | 619.2             | 946.8                              | 823.3        |
| Ammonia/Urea <sup>1</sup>  | 943                                  | 3610                                       | 3518                                     | 928.6                            | 558.3                  | 619.2             | 1029.9                             | -            |
| Urea*                      | -                                    | -                                          | 1668                                     | -                                | 558.3                  | 619.2             | 83.1                               | 72.3         |
| UAN <sup>5</sup>           | 178                                  | 1106                                       | 4326                                     | 402.8                            | 558.3                  | 619.2             | 446.7                              | 388.5        |
| Mel <sup>3</sup>           | 350                                  | 182                                        | 180                                      | 347.9                            | 532.9                  | 619.2             | 404.2                              | 351.5        |
| MeOH <sup>4</sup>          | 700                                  | 4848                                       | 5027                                     | 715.4                            | 536.4                  | 619.2             | 825.8                              | 718.1        |

\*TCI for Urea plant was calculated by subtracting combined  $NH_3$ /Urea plant from  $NH_3$ (BAU) plant.

## 2.3 Operating Cost (OPEX)

To calculate the total operating costs, utility costs (cooling water, steam, electricity and process water) were obtained from Turton et. al<sup>12</sup> and raw material costs (natural gas) as well as product values were based on global market trends in 2019. Electricity rates were obtained from a local supplier<sup>13</sup>.

Operating labor costs was also calculated by establishing key unit operations within each integrated network, according to **Eq. 5- 6** from Turton et al<sup>12</sup> and with fixed cost allocations taken from Sinnott and Towler<sup>11</sup>.

$$\text{No of operators} = [6.29 + (\text{No. of equipment} \times 0.23)]^{0.5} \quad (5)$$

$$\text{Labour costs} = (\text{Approximate No. of operators} \times 4.5) \times 66910 \times 1.19 \quad (6)$$

## 2.4 Return on Investment (ROI)

The ROI metric was utilized as an economic indicator to evaluate the economic viability of the various pathways - results given in **Table S3**.

**Table S3: Parameters utilized to calculate ROI for each pathway**

| Scenario                            | Annual Sales<br>[ \$ MM<br>US/year] | Fixed Cost<br>[ \$ MM US/year] | Total Operating<br>Cost [ \$ MM<br>US/year] | ROI [%] |
|-------------------------------------|-------------------------------------|--------------------------------|---------------------------------------------|---------|
| BAU                                 | 174                                 | 158                            | 224                                         | 0.17    |
| BAU + Urea +<br>MeOH                | 885                                 | 312                            | 523                                         | 19      |
| BAU + Urea                          | 245                                 | 174                            | 257                                         | 3       |
| BAU + Urea +<br>UAN + MeOH          | 957                                 | 387                            | 600                                         | 16      |
| BAU + Urea +<br>UAN                 | 316                                 | 249                            | 335                                         | 3       |
| BAU + Urea + Mel<br>+ MeOH          | 927                                 | 380                            | 593                                         | 15      |
| BAU + Urea + Mel                    | 287                                 | 243                            | 328                                         | 2       |
| BAU + Urea +<br>UAN + Mel +<br>MeOH | 1021                                | 456                            | 670                                         | 14      |
| BAU + Urea +<br>UAN + Mel           | 381                                 | 318                            | 405                                         | 3       |

**Sample Calculation of ammonia production capacity of 1850 MTPD operational costs for 2019. Using equation 2:**

$$C_{2019} = C_{2017} \left( \frac{S_{1850}}{S_{1220}} \right)^{0.6} \times \frac{619.2}{558.3}$$

Average OPEX for the natural gas ammonia production facility ( $C_{2017}$ ) in accordance with literature = US \$265/tonne.

OPEX for an 1850 MTPD facility in 2019: 
$$C_{2019} = \frac{\text{US\$265}}{\text{tonne}} \left( \frac{1850}{1220} \right)^{0.6} \times \frac{619.2}{558.3} = \text{US\$ } 377.3/\text{tonne}.$$

Average yearly OPEX for a 1850 MTPD plant in 2019 = 
$$\frac{377.3}{\text{tonne}} \times \frac{1850 \text{ tonne}}{\text{day}} \times \frac{330 \text{ day}}{\text{year}} = \text{\$MM US } 230.4$$

Average deviation in yearly OPEX from average = \$MM US 4.49

Average deviation in average OPEX from average = US\$7.35/tonne.

### **3.0 Life Cycle Impact Assessment (LCIA)**

**Table S4** below contains the datasets utilized from the Ecoinvent v3.4 database. For each selection, the data was aligned to reflect that of the processes within the Trinidad and Tobago energy sector as closely as possible. This was achieved by specifying heating and electricity consumption affiliated with natural gas combustion only. For nitric acid production, NO<sub>x</sub> emissions were assumed to be negligible following selective catalytic reduction with ammonia. An economic allocation approach was chosen for each scenario based on the current market prices of the products and is shown in **Table S5**. **Table S6** gives the normalized life cycle inventory (LCI) across the various scenarios, using SimaPro v9.0.0.30 while **Tables S7-S15** gives the characterized environmental burdens for each impact category.

**Table S4: LCA dataset retrieved from Ecoinvent v3.4**

| Process Stream        | Dataset                                  | Year |
|-----------------------|------------------------------------------|------|
| Heating Utility       | Heat, district or industrial natural gas | 2013 |
| Natural Gas Feedstock | Natural gas, low pressure                | 2015 |
| Process Water         | Water, deionized                         | 2010 |
| Electricity           | Electricity, high voltage, produced      | 2012 |

**Table S5: Economic approach allocation for integrated pathways**

| Product            | Scenario        |                   |            |                         |                  |                         |                  |                               |                        |         |
|--------------------|-----------------|-------------------|------------|-------------------------|------------------|-------------------------|------------------|-------------------------------|------------------------|---------|
|                    | BAU             | BAU + Urea + MeOH | BAU + Urea | BAU + Urea + UAN + MeOH | BAU + Urea + UAN | BAU + Urea + Mel + MeOH | BAU + Urea + Mel | BAU + Urea + UAN + Mel + MeOH | BAU + Urea + UAN + Mel |         |
| Percent Allocation | NH <sub>3</sub> | 100.00 %          | 10.85 %    | 39.26 %                 | 1.74%            | 5.26%                   | 10.36 %          | 33.52 %                       | 1.63%                  | 4.37%   |
|                    | Urea            | -                 | 16.79 %    | 60.74 %                 | -                | -                       | 13.63 %          | 44.09 %                       | -                      | -       |
|                    | UAN             | -                 | -          | -                       | 31.33 %          | 94.74 %                 | -                | -                             | 29.36 %                | 78.77 % |
|                    | Mel             | -                 | -          | -                       | -                | -                       | 6.92%            | 22.39 %                       | 6.28%                  | 16.86 % |
|                    | MeOH            | -                 | 72.36 %    | -                       | 66.93 %          | -                       | 69.09 %          | -                             | 62.72 %                | -       |

**Table S6: Normalized LCI for integrated pathways (Functional unit: 1000 kg NH<sub>3</sub>)**

| <b>LCA Inventory Parameter</b>               | <b>BAU</b> | <b>BAU + Urea + MeOH</b> | <b>BAU + Urea</b> | <b>BAU + Urea + UAN + MeOH</b> | <b>BAU + Urea + UAN</b> | <b>BAU + Urea + Mel + MeOH</b> | <b>BAU + Urea + Mel</b> | <b>BAU + Urea + UAN + Mel + MeOH</b> | <b>BAU + Urea + UAN + Mel</b> |
|----------------------------------------------|------------|--------------------------|-------------------|--------------------------------|-------------------------|--------------------------------|-------------------------|--------------------------------------|-------------------------------|
| <b>Inputs from Technosphere</b>              |            |                          |                   |                                |                         |                                |                         |                                      |                               |
| Natural Gas Heating (MJ)                     | 16896.12   | 89097.68                 | 43755.75          | 502233.46                      | 240547.83               | 89450.21                       | 44108.29                | 504268.07                            | 242582.44                     |
| Natural Gas Feedstock (m <sup>3</sup> )      | 39.79      | 224.54                   | 72.08             | 1295.89                        | 416.03                  | 224.54                         | 72.08                   | 1295.89                              | 416.03                        |
| Process Water (kg)                           | 877.15     | 5339.78                  | 2405.60           | 49484.94                       | 32550.67                | 6397.38                        | 3463.20                 | 55588.77                             | 38654.50                      |
| Electricity (MW)                             | 0.02       | 0.69                     | 0.55              | 4.35                           | 3.54                    | 0.75                           | 0.61                    | 4.69                                 | 3.88                          |
| <b>Emissions to Air</b>                      |            |                          |                   |                                |                         |                                |                         |                                      |                               |
| Process based CO <sub>2</sub> Emissions (kg) | 1511.00    | 1671.28                  | 1540.34           | 9645.60                        | 8889.90                 | 1671.28                        | 1540.34                 | 9645.60                              | 8889.90                       |
| Process based NH <sub>3</sub> Emissions (kg) | -          | 5.68                     | 5.68              | 53.92                          | 53.92                   | 5.98                           | 5.98                    | 55.67                                | 55.67                         |
| Process based Isocyanic Acid Emissions (kg)  | -          | -                        | -                 | -                              | -                       | 0.76                           | 0.76                    | 4.39                                 | 4.39                          |
| <b>Emissions to Water</b>                    |            |                          |                   |                                |                         |                                |                         |                                      |                               |
| NH <sub>4</sub> <sup>-</sup> (kg)            | -          | 0.59                     | 0.59              | 4.54                           | 4.54                    | 0.59                           | 0.59                    | 4.54                                 | 4.54                          |



**Table S7: Charaterised LCIA profile for BAU scenario (ReCiPe 2016 Midpoint (H) V1.01)**

| <b>Impact category</b>                  | <b>Unit</b>                    | <b>Total</b> | <b>Process Emissions</b> | <b>Heating</b> | <b>Natural Gas Consumption</b> | <b>Process Water</b> | <b>Electricity Demand</b> |
|-----------------------------------------|--------------------------------|--------------|--------------------------|----------------|--------------------------------|----------------------|---------------------------|
| Global warming                          | kg CO <sub>2</sub> eq          | 2750.34      | 1511.00                  | 1202.79        | 24.90                          | 1.48                 | 10.17                     |
| Stratospheric ozone depletion           | kg CFC11 eq x 10 <sup>-5</sup> | 18.51        | 0.00                     | 16.74          | 1.39                           | 0.11                 | 0.27                      |
| Ozone formation, Human health           | kg NO <sub>x</sub> eq          | 0.72         | 0.00                     | 0.67           | 0.03                           | 0.00                 | 0.01                      |
| Fine particulate matter formation       | kg PM2.5 eq                    | 0.30         | 0.00                     | 0.28           | 0.02                           | 0.00                 | 0.00                      |
| Ozone formation, Terrestrial ecosystems | kg NO <sub>x</sub> eq          | 0.77         | 0.00                     | 0.72           | 0.04                           | 0.00                 | 0.01                      |
| Terrestrial acidification               | kg SO <sub>2</sub> eq          | 0.91         | 0.00                     | 0.84           | 0.06                           | 0.01                 | 0.00                      |
| Freshwater eutrophication               | kg P eq x 10 <sup>-4</sup>     | 127.58       | 0.00                     | 108.13         | 11.45                          | 6.52                 | 1.48                      |
| Marine eutrophication                   | kg N eq x 10 <sup>-4</sup>     | 23.13        | 0.00                     | 20.69          | 1.87                           | 0.49                 | 0.09                      |
| Terrestrial ecotoxicity                 | kg 1,4-DCB                     | 62.61        | 0.00                     | 49.49          | 8.40                           | 2.76                 | 1.96                      |
| Freshwater ecotoxicity                  | kg 1,4-DCB                     | 1.70         | 0.00                     | 1.48           | 0.16                           | 0.04                 | 0.02                      |
| Marine ecotoxicity                      | kg 1,4-DCB                     | 2.46         | 0.00                     | 2.13           | 0.25                           | 0.05                 | 0.03                      |
| Human carcinogenic toxicity             | kg 1,4-DCB                     | 3.96         | 0.00                     | 3.42           | 0.35                           | 0.16                 | 0.03                      |
| Human non-carcinogenic toxicity         | kg 1,4-DCB                     | 41.23        | 0.00                     | 35.58          | 4.10                           | 0.98                 | 0.56                      |
| Mineral resource scarcity               | kg Cu eq                       | 0.29         | 0.00                     | 0.25           | 0.03                           | 0.01                 | 0.00                      |
| Fossil resource scarcity                | kg oil eq                      | 477.46       | 0.00                     | 434.48         | 38.32                          | 0.35                 | 4.31                      |
| Water consumption                       | m <sup>3</sup>                 | 1.18         | 0.00                     | 0.22           | 0.02                           | 0.91                 | 0.02                      |

**Table S8: Charaterised LCIA profile for BAU + Urea + MeOH scenario (ReCiPe 2016 Midpoint (H) V1.01)**

| Impact category                         | Unit                           | Total  | Process Emissions | Heating | Natural Gas Consumption | Process Water | Electricity Demand |
|-----------------------------------------|--------------------------------|--------|-------------------|---------|-------------------------|---------------|--------------------|
| Global warming                          | kg CO <sub>2</sub> eq          | 931.39 | 181.33            | 688.18  | 15.24                   | 0.98          | 45.67              |
| Stratospheric ozone depletion           | kg CFC11 eq x 10 <sup>-5</sup> | 11.71  | 0.00              | 9.58    | 0.85                    | 0.07          | 1.21               |
| Ozone formation, Human health           | kg NO <sub>x</sub> eq          | 0.45   | 0.00              | 0.39    | 0.02                    | 0.00          | 0.04               |
| Fine particulate matter formation       | kg PM2.5 eq                    | 0.33   | 0.15              | 0.16    | 0.01                    | 0.00          | 0.01               |
| Ozone formation, Terrestrial ecosystems | kg NO <sub>x</sub> eq          | 0.48   | 0.00              | 0.41    | 0.02                    | 0.00          | 0.04               |
| Terrestrial acidification               | kg SO <sub>2</sub> eq          | 1.75   | 1.21              | 0.48    | 0.04                    | 0.00          | 0.02               |
| Freshwater eutrophication               | kg P eq x 10 <sup>-4</sup>     | 79.82  | 0.00              | 61.86   | 7.01                    | 4.31          | 6.64               |
| Marine eutrophication                   | kg N eq x 10 <sup>-4</sup>     | 162.05 | 148.34            | 11.84   | 1.14                    | 0.32          | 0.41               |
| Terrestrial ecotoxicity                 | kg 1,4-DCB                     | 44.06  | 0.00              | 28.32   | 5.14                    | 1.82          | 8.78               |
| Freshwater ecotoxicity                  | kg 1,4-DCB                     | 1.05   | 0.00              | 0.85    | 0.10                    | 0.03          | 0.08               |
| Marine ecotoxicity                      | kg 1,4-DCB                     | 1.52   | 0.00              | 1.22    | 0.15                    | 0.04          | 0.11               |
| Human carcinogenic toxicity             | kg 1,4-DCB                     | 2.42   | 0.00              | 1.95    | 0.22                    | 0.10          | 0.15               |
| Human non-carcinogenic toxicity         | kg 1,4-DCB                     | 26.05  | 0.00              | 20.36   | 2.51                    | 0.65          | 2.53               |
| Mineral resource scarcity               | kg Cu eq                       | 0.18   | 0.00              | 0.14    | 0.02                    | 0.00          | 0.02               |
| Fossil resource scarcity                | kg oil eq                      | 291.64 | 0.00              | 248.58  | 23.46                   | 0.23          | 19.36              |
| Water consumption                       | m <sup>3</sup>                 | 0.82   | 0.00              | 0.13    | 0.01                    | 0.60          | 0.08               |

**Table S9: Charaterised LCIA profile for BAU + Urea scenario (ReCiPe 2016 Midpoint (H) V1.01)**

| <b>Impact category</b>                  | <b>Unit</b>                    | <b>Total</b> | <b>Process Emissions</b> | <b>Heating</b> | <b>Natural Gas Consumption</b> | <b>Process Water</b> | <b>Electricity Demand</b> |
|-----------------------------------------|--------------------------------|--------------|--------------------------|----------------|--------------------------------|----------------------|---------------------------|
| Global warming                          | kg CO <sub>2</sub> eq          | 1978.56      | 604.74                   | 1222.89        | 17.71                          | 1.59                 | 131.63                    |
| Stratospheric ozone depletion           | kg CFC11 eq x 10 <sup>-5</sup> | 21.61        | 0.00                     | 17.02          | 0.99                           | 0.11                 | 3.48                      |
| Ozone formation, Human health           | kg NO <sub>x</sub> eq          | 0.82         | 0.00                     | 0.69           | 0.02                           | 0.00                 | 0.11                      |
| Fine particulate matter formation       | kg PM2.5 eq                    | 0.86         | 0.54                     | 0.28           | 0.01                           | 0.00                 | 0.02                      |
| Ozone formation, Terrestrial ecosystems | kg NO <sub>x</sub> eq          | 0.88         | 0.00                     | 0.74           | 0.03                           | 0.00                 | 0.12                      |
| Terrestrial acidification               | kg SO <sub>2</sub> eq          | 5.33         | 4.37                     | 0.85           | 0.04                           | 0.01                 | 0.05                      |
| Freshwater eutrophication               | kg P eq x 10 <sup>-4</sup>     | 144.24       | 0.00                     | 109.93         | 8.14                           | 7.03                 | 19.14                     |
| Marine eutrophication                   | kg N eq x 10 <sup>-4</sup>     | 560.82       | 536.76                   | 21.03          | 1.33                           | 0.52                 | 1.17                      |
| Terrestrial ecotoxicity                 | kg 1,4-DCB                     | 84.57        | 0.00                     | 50.32          | 5.97                           | 2.97                 | 25.31                     |
| Freshwater ecotoxicity                  | kg 1,4-DCB                     | 1.88         | 0.00                     | 1.51           | 0.11                           | 0.04                 | 0.22                      |
| Marine ecotoxicity                      | kg 1,4-DCB                     | 2.74         | 0.00                     | 2.17           | 0.18                           | 0.06                 | 0.33                      |
| Human carcinogenic toxicity             | kg 1,4-DCB                     | 4.32         | 0.00                     | 3.47           | 0.25                           | 0.17                 | 0.43                      |
| Human non-carcinogenic toxicity         | kg 1,4-DCB                     | 47.45        | 0.00                     | 36.18          | 2.91                           | 1.06                 | 7.30                      |
| Mineral resource scarcity               | kg Cu eq                       | 0.33         | 0.00                     | 0.25           | 0.02                           | 0.01                 | 0.05                      |
| Fossil resource scarcity                | kg oil eq                      | 525.17       | 0.00                     | 441.74         | 27.26                          | 0.38                 | 55.81                     |
| Water consumption                       | m <sup>3</sup>                 | 1.45         | 0.00                     | 0.23           | 0.02                           | 0.98                 | 0.23                      |

**Table S10: Charaterised LCIA profile for BAU + Urea + UAN + MeOH scenario (ReCiPe 2016 Midpoint (H) V1.01)**

| <b>Impact category</b>                  | <b>Unit</b>                    | <b>Total</b> | <b>Process Emissions</b> | <b>Heating</b> | <b>Natural Gas Consumption</b> | <b>Process Water</b> | <b>Electricity Demand</b> |
|-----------------------------------------|--------------------------------|--------------|--------------------------|----------------|--------------------------------|----------------------|---------------------------|
| Global warming                          | kg CO <sub>2</sub> eq          | 851.41       | 167.83                   | 622.10         | 14.11                          | 1.45                 | 45.92                     |
| Stratospheric ozone depletion           | kg CFC11 eq x 10 <sup>-5</sup> | 10.77        | 0.00                     | 8.66           | 0.79                           | 0.10                 | 1.21                      |
| Ozone formation, Human health           | kg NO <sub>x</sub> eq          | 0.41         | 0.00                     | 0.35           | 0.02                           | 0.00                 | 0.04                      |
| Fine particulate matter formation       | kg PM2.5 eq                    | 0.39         | 0.23                     | 0.14           | 0.01                           | 0.00                 | 0.01                      |
| Ozone formation, Terrestrial ecosystems | kg NO <sub>x</sub> eq          | 0.44         | 0.00                     | 0.37           | 0.02                           | 0.00                 | 0.04                      |
| Terrestrial acidification               | kg SO <sub>2</sub> eq          | 2.33         | 1.84                     | 0.43           | 0.03                           | 0.01                 | 0.02                      |
| Freshwater eutrophication               | kg P eq x 10 <sup>-4</sup>     | 75.49        | 0.00                     | 55.92          | 6.49                           | 6.40                 | 6.68                      |
| Marine eutrophication                   | kg N eq x 10 <sup>-4</sup>     | 194.49       | 181.85                   | 10.70          | 1.06                           | 0.48                 | 0.41                      |
| Terrestrial ecotoxicity                 | kg 1,4-DCB                     | 41.90        | 0.00                     | 25.60          | 4.76                           | 2.71                 | 8.83                      |
| Freshwater ecotoxicity                  | kg 1,4-DCB                     | 0.97         | 0.00                     | 0.77           | 0.09                           | 0.04                 | 0.08                      |
| Marine ecotoxicity                      | kg 1,4-DCB                     | 1.41         | 0.00                     | 1.10           | 0.14                           | 0.05                 | 0.11                      |
| Human carcinogenic toxicity             | kg 1,4-DCB                     | 2.27         | 0.00                     | 1.77           | 0.20                           | 0.15                 | 0.15                      |
| Human non-carcinogenic toxicity         | kg 1,4-DCB                     | 24.24        | 0.00                     | 18.40          | 2.32                           | 0.97                 | 2.55                      |
| Mineral resource scarcity               | kg Cu eq                       | 0.17         | 0.00                     | 0.13           | 0.02                           | 0.01                 | 0.02                      |
| Fossil resource scarcity                | kg oil eq                      | 266.25       | 0.00                     | 224.72         | 21.72                          | 0.34                 | 19.47                     |
| Water consumption                       | m <sup>3</sup>                 | 1.10         | 0.00                     | 0.12           | 0.01                           | 0.89                 | 0.08                      |

**Table S11: Charaterised LCIA profile for BAU + Urea + UAN scenario (ReCiPe 2016 Midpoint (H) V1.01)**

| <b>Impact category</b>                  | <b>Unit</b>                    | <b>Total</b> | <b>Process Emissions</b> | <b>Heating</b> | <b>Natural Gas Consumption</b> | <b>Process Water</b> | <b>Electricity Demand</b> |
|-----------------------------------------|--------------------------------|--------------|--------------------------|----------------|--------------------------------|----------------------|---------------------------|
| Global warming                          | kg CO <sub>2</sub> eq          | 1497.74      | 467.61                   | 900.72         | 13.69                          | 2.88                 | 112.84                    |
| Stratospheric ozone depletion           | kg CFC11 eq x 10 <sup>-5</sup> | 16.49        | 0.00                     | 12.54          | 0.77                           | 0.21                 | 2.99                      |
| Ozone formation, Human health           | kg NO <sub>x</sub> eq          | 0.63         | 0.00                     | 0.50           | 0.02                           | 0.01                 | 0.10                      |
| Fine particulate matter formation       | kg PM2.5 eq                    | 0.92         | 0.68                     | 0.21           | 0.01                           | 0.01                 | 0.02                      |
| Ozone formation, Terrestrial ecosystems | kg NO <sub>x</sub> eq          | 0.67         | 0.00                     | 0.54           | 0.02                           | 0.01                 | 0.10                      |
| Terrestrial acidification               | kg SO <sub>2</sub> eq          | 6.28         | 5.56                     | 0.63           | 0.03                           | 0.01                 | 0.05                      |
| Freshwater eutrophication               | kg P eq x 10 <sup>-4</sup>     | 116.41       | 0.00                     | 80.97          | 6.30                           | 12.74                | 16.41                     |
| Marine eutrophication                   | kg N eq x 10 <sup>-4</sup>     | 568.20       | 549.73                   | 15.49          | 1.03                           | 0.95                 | 1.00                      |
| Terrestrial ecotoxicity                 | kg 1,4-DCB                     | 68.77        | 0.00                     | 37.06          | 4.62                           | 5.39                 | 21.70                     |
| Freshwater ecotoxicity                  | kg 1,4-DCB                     | 1.46         | 0.00                     | 1.11           | 0.09                           | 0.08                 | 0.19                      |
| Marine ecotoxicity                      | kg 1,4-DCB                     | 2.12         | 0.00                     | 1.60           | 0.14                           | 0.11                 | 0.28                      |
| Human carcinogenic toxicity             | kg 1,4-DCB                     | 3.42         | 0.00                     | 2.56           | 0.19                           | 0.30                 | 0.37                      |
| Human non-carcinogenic toxicity         | kg 1,4-DCB                     | 37.08        | 0.00                     | 26.65          | 2.25                           | 1.92                 | 6.26                      |
| Mineral resource scarcity               | kg Cu eq                       | 0.25         | 0.00                     | 0.19           | 0.01                           | 0.01                 | 0.04                      |
| Fossil resource scarcity                | kg oil eq                      | 394.96       | 0.00                     | 325.36         | 21.08                          | 0.68                 | 47.84                     |
| Water consumption                       | m <sup>3</sup>                 | 2.16         | 0.00                     | 0.17           | 0.01                           | 1.78                 | 0.20                      |

**Table S12: Charaterised LCIA profile for BAU + Urea + Mel + MeOH scenario (ReCiPe 2016 Midpoint (H) V1.01)**

| <b>Impact category</b>                  | <b>Unit</b>                    | <b>Total</b> | <b>Process Emissions</b> | <b>Heating</b> | <b>Natural Gas Consumption</b> | <b>Process Water</b> | <b>Electricity Demand</b> |
|-----------------------------------------|--------------------------------|--------------|--------------------------|----------------|--------------------------------|----------------------|---------------------------|
| Global warming                          | kg CO <sub>2</sub> eq          | 895.80       | 173.14                   | 659.70         | 14.55                          | 1.12                 | 47.29                     |
| Stratospheric ozone depletion           | kg CFC11 eq x 10 <sup>-5</sup> | 11.33        | 0.00                     | 9.18           | 0.81                           | 0.08                 | 1.25                      |
| Ozone formation, Human health           | kg NO <sub>x</sub> eq          | 0.43         | 0.00                     | 0.37           | 0.02                           | 0.00                 | 0.04                      |
| Fine particulate matter formation       | kg PM2.5 eq                    | 0.32         | 0.15                     | 0.15           | 0.01                           | 0.00                 | 0.01                      |
| Ozone formation, Terrestrial ecosystems | kg NO <sub>x</sub> eq          | 0.46         | 0.00                     | 0.40           | 0.02                           | 0.00                 | 0.04                      |
| Terrestrial acidification               | kg SO <sub>2</sub> eq          | 1.73         | 1.21                     | 0.46           | 0.04                           | 0.00                 | 0.02                      |
| Freshwater eutrophication               | kg P eq x 10 <sup>-4</sup>     | 77.80        | 0.00                     | 59.30          | 6.69                           | 4.93                 | 6.86                      |
| Marine eutrophication                   | kg N eq x 10 <sup>-4</sup>     | 154.87       | 141.64                   | 11.35          | 10.91                          | 0.37                 | 0.42                      |
| Terrestrial ecotoxicity                 | kg 1,4-DCB                     | 43.23        | 0.00                     | 27.14          | 4.91                           | 2.09                 | 9.09                      |
| Freshwater ecotoxicity                  | kg 1,4-DCB                     | 1.01         | 0.00                     | 0.81           | 0.09                           | 0.03                 | 0.08                      |
| Marine ecotoxicity                      | kg 1,4-DCB                     | 1.48         | 0.00                     | 1.17           | 0.15                           | 0.04                 | 0.12                      |
| Human carcinogenic toxicity             | kg 1,4-DCB                     | 2.35         | 0.00                     | 1.87           | 0.21                           | 0.12                 | 0.15                      |
| Human non-carcinogenic toxicity         | kg 1,4-DCB                     | 25.28        | 0.00                     | 19.52          | 2.40                           | 0.74                 | 2.62                      |
| Mineral resource scarcity               | kg Cu eq                       | 0.17         | 0.00                     | 0.14           | 0.02                           | 0.00                 | 0.02                      |
| Fossil resource scarcity                | kg oil eq                      | 281.02       | 0.00                     | 238.30         | 22.40                          | 0.26                 | 20.05                     |
| Water consumption                       | m <sup>3</sup>                 | 0.91         | 0.00                     | 0.12           | 0.01                           | 0.69                 | 0.08                      |

**Table S13: Charaterised LCIA profile for BAU + Urea + Mel scenario (ReCiPe 2016 Midpoint (H) V1.01)**

| <b>Impact category</b>                  | <b>Unit</b>                    | <b>Total</b> | <b>Process Emissions</b> | <b>Heating</b> | <b>Natural Gas Consumption</b> | <b>Process Water</b> | <b>Electricity Demand</b> |
|-----------------------------------------|--------------------------------|--------------|--------------------------|----------------|--------------------------------|----------------------|---------------------------|
| Global warming                          | kg CO <sub>2</sub> eq          | 1710.22      | 516.32                   | 1052.51        | 15.12                          | 1.95                 | 124.31                    |
| Stratospheric ozone depletion           | kg CFC11 eq x 10 <sup>-5</sup> | 18.92        | 0.00                     | 14.65          | 0.85                           | 0.14                 | 3.29                      |
| Ozone formation, Human health           | kg NO <sub>x</sub> eq          | 0.72         | 0.00                     | 0.59           | 0.02                           | 0.00                 | 0.11                      |
| Fine particulate matter formation       | kg PM2.5 eq                    | 0.76         | 0.48                     | 0.24           | 0.01                           | 0.00                 | 0.02                      |
| Ozone formation, Terrestrial ecosystems | kg NO <sub>x</sub> eq          | 0.77         | 0.00                     | 0.63           | 0.02                           | 0.00                 | 0.11                      |
| Terrestrial acidification               | kg SO <sub>2</sub> eq          | 4.76         | 3.93                     | 0.73           | 0.04                           | 0.01                 | 0.05                      |
| Freshwater eutrophication               | kg P eq x 10 <sup>-4</sup>     | 128.28       | 0.00                     | 946.16         | 6.95                           | 8.63                 | 18.07                     |
| Marine eutrophication                   | kg N eq x 10 <sup>-4</sup>     | 479.27       | 458.29                   | 18.10          | 1.13                           | 0.64                 | 1.10                      |
| Terrestrial ecotoxicity                 | kg 1,4-DCB                     | 75.96        | 0.00                     | 43.31          | 5.10                           | 3.66                 | 23.90                     |
| Freshwater ecotoxicity                  | kg 1,4-DCB                     | 1.65         | 0.00                     | 1.30           | 0.10                           | 0.05                 | 0.21                      |
| Marine ecotoxicity                      | kg 1,4-DCB                     | 2.40         | 0.00                     | 1.87           | 0.15                           | 0.07                 | 0.31                      |
| Human carcinogenic toxicity             | kg 1,4-DCB                     | 3.81         | 0.00                     | 2.99           | 0.21                           | 0.21                 | 0.40                      |
| Human non-carcinogenic toxicity         | kg 1,4-DCB                     | 41.82        | 0.00                     | 31.14          | 2.49                           | 1.30                 | 6.89                      |
| Mineral resource scarcity               | kg Cu eq                       | 0.29         | 0.00                     | 0.22           | 0.02                           | 0.01                 | 0.04                      |
| Fossil resource scarcity                | kg oil eq                      | 456.63       | 0.00                     | 380.19         | 23.27                          | 0.46                 | 52.70                     |
| Water consumption                       | m <sup>3</sup>                 | 1.63         | 0.00                     | 0.19           | 0.01                           | 1.21                 | 0.22                      |

**Table S14: Charaterised LCIA profile for BAU + Urea + UAN + Mel + MeOH scenario (ReCiPe 2016 Midpoint (H) V1.01)**

| <b>Impact category</b>                  | <b>Unit</b>                    | <b>Total</b> | <b>Process Emissions</b> | <b>Heating</b> | <b>Natural Gas Consumption</b> | <b>Process Water</b> | <b>Electricity Demand</b> |
|-----------------------------------------|--------------------------------|--------------|--------------------------|----------------|--------------------------------|----------------------|---------------------------|
| Global warming                          | kg CO <sub>2</sub> eq          | 808.40       | 158.19                   | 588.72         | 13.30                          | 1.53                 | 46.66                     |
| Stratospheric ozone depletion           | kg CFC11 eq x 10 <sup>-5</sup> | 10.28        | 0.00                     | 8.19           | 0.74                           | 0.11                 | 1.23                      |
| Ozone formation, Human health           | kg NO <sub>x</sub> eq          | 0.39         | 0.00                     | 0.33           | 0.02                           | 0.00                 | 0.04                      |
| Fine particulate matter formation       | kg PM2.5 eq                    | 0.38         | 0.22                     | 0.14           | 0.01                           | 0.00                 | 0.01                      |
| Ozone formation, Terrestrial ecosystems | kg NO <sub>x</sub> eq          | 0.42         | 0.00                     | 0.35           | 0.02                           | 0.00                 | 0.04                      |
| Terrestrial acidification               | kg SO <sub>2</sub> eq          | 2.26         | 1.79                     | 0.41           | 0.03                           | 0.01                 | 0.02                      |
| Freshwater eutrophication               | kg P eq x 10 <sup>-4</sup>     | 72.60        | 0.00                     | 52.92          | 6.12                           | 6.78                 | 6.78                      |
| Marine eutrophication                   | kg N eq x 10 <sup>-4</sup>     | 183.44       | 171.40                   | 10.13          | 0.99                           | 0.51                 | 0.41                      |
| Terrestrial ecotoxicity                 | kg 1,4-DCB                     | 40.55        | 0.00                     | 24.22          | 4.49                           | 2.87                 | 8.97                      |
| Freshwater ecotoxicity                  | kg 1,4-DCB                     | 0.93         | 0.00                     | 0.73           | 0.08                           | 0.04                 | 0.08                      |
| Marine ecotoxicity                      | kg 1,4-DCB                     | 1.35         | 0.00                     | 1.04           | 0.13                           | 0.06                 | 0.12                      |
| Human carcinogenic toxicity             | kg 1,4-DCB                     | 2.17         | 0.00                     | 1.67           | 0.19                           | 0.16                 | 0.15                      |
| Human non-carcinogenic toxicity         | kg 1,4-DCB                     | 23.22        | 0.00                     | 17.42          | 2.19                           | 1.02                 | 2.59                      |
| Mineral resource scarcity               | kg Cu eq                       | 0.16         | 0.00                     | 0.12           | 0.01                           | 0.01                 | 0.02                      |
| Fossil resource scarcity                | kg oil eq                      | 253.27       | 0.00                     | 212.66         | 20.47                          | 0.36                 | 19.78                     |
| Water consumption                       | m <sup>3</sup>                 | 1.15         | 0.00                     | 0.11           | 0.01                           | 0.95                 | 0.08                      |



**Table S15: Charaterised LCIA profile for BAU + Urea + UAN + Mel scenario (ReCiPe 2016 Midpoint (H) V1.01)**

| <b>Impact category</b>                  | <b>Unit</b>                    | <b>Total</b> | <b>Process Emissions</b> | <b>Heating</b> | <b>Natural Gas Consumption</b> | <b>Process Water</b> | <b>Electricity Demand</b> |
|-----------------------------------------|--------------------------------|--------------|--------------------------|----------------|--------------------------------|----------------------|---------------------------|
| Global warming                          | kg CO <sub>2</sub> eq          | 1260.09      | 388.49                   | 754.65         | 11.38                          | 2.84                 | 102.73                    |
| Stratospheric ozone depletion           | kg CFC11 eq x 10 <sup>-5</sup> | 14.06        | 0.00                     | 10.50          | 0.64                           | 0.20                 | 2.72                      |
| Ozone formation, Human health           | kg NO <sub>x</sub> eq          | 0.53         | 0.00                     | 0.42           | 0.01                           | 0.01                 | 0.09                      |
| Fine particulate matter formation       | kg PM2.5 eq                    | 0.79         | 0.58                     | 0.17           | 0.01                           | 0.01                 | 0.02                      |
| Ozone formation, Terrestrial ecosystems | kg NO <sub>x</sub> eq          | 0.57         | 0.00                     | 0.45           | 0.02                           | 0.01                 | 0.09                      |
| Terrestrial acidification               | kg SO <sub>2</sub> eq          | 5.37         | 4.77                     | 0.52           | 0.03                           | 0.01                 | 0.04                      |
| Freshwater eutrophication               | kg P eq x 10 <sup>-4</sup>     | 100.57       | 0.00                     | 67.84          | 5.23                           | 12.56                | 14.94                     |
| Marine eutrophication                   | kg N eq x 10 <sup>-4</sup>     | 472.40       | 456.71                   | 12.98          | 0.85                           | 0.94                 | 0.91                      |
| Terrestrial ecotoxicity                 | kg 1,4-DCB                     | 59.96        | 0.00                     | 31.05          | 3.84                           | 5.32                 | 19.75                     |
| Freshwater ecotoxicity                  | kg 1,4-DCB                     | 1.25         | 0.00                     | 0.93           | 0.07                           | 0.07                 | 0.17                      |
| Marine ecotoxicity                      | kg 1,4-DCB                     | 1.82         | 0.00                     | 1.34           | 0.11                           | 0.10                 | 0.26                      |
| Human carcinogenic toxicity             | kg 1,4-DCB                     | 2.94         | 0.00                     | 2.14           | 0.16                           | 0.30                 | 0.33                      |
| Human non-carcinogenic toxicity         | kg 1,4-DCB                     | 31.79        | 0.00                     | 22.32          | 1.87                           | 1.90                 | 5.70                      |
| Mineral resource scarcity               | kg Cu eq                       | 0.22         | 0.00                     | 0.16           | 0.01                           | 0.01                 | 0.04                      |
| Fossil resource scarcity                | kg oil eq                      | 334.33       | 0.00                     | 272.60         | 17.51                          | 0.67                 | 43.55                     |
| Water consumption                       | m <sup>3</sup>                 | 2.08         | 0.00                     | 0.14           | 0.01                           | 1.75                 | 0.18                      |

## **4.0 Life Cycle Contributinal Analysis**

The LCIA was conducted across all scenarios based on the functional unit of one (1) metric tonne of NH<sub>3</sub> produced per hour. The total characterized environmental effects were identified via a midpoint approach based on a cradle-to-gate life cycle. The heating utility and electricity demand were the major contributors to the environmental impacts across impact categories affiliated with natural gas extraction and combustion.

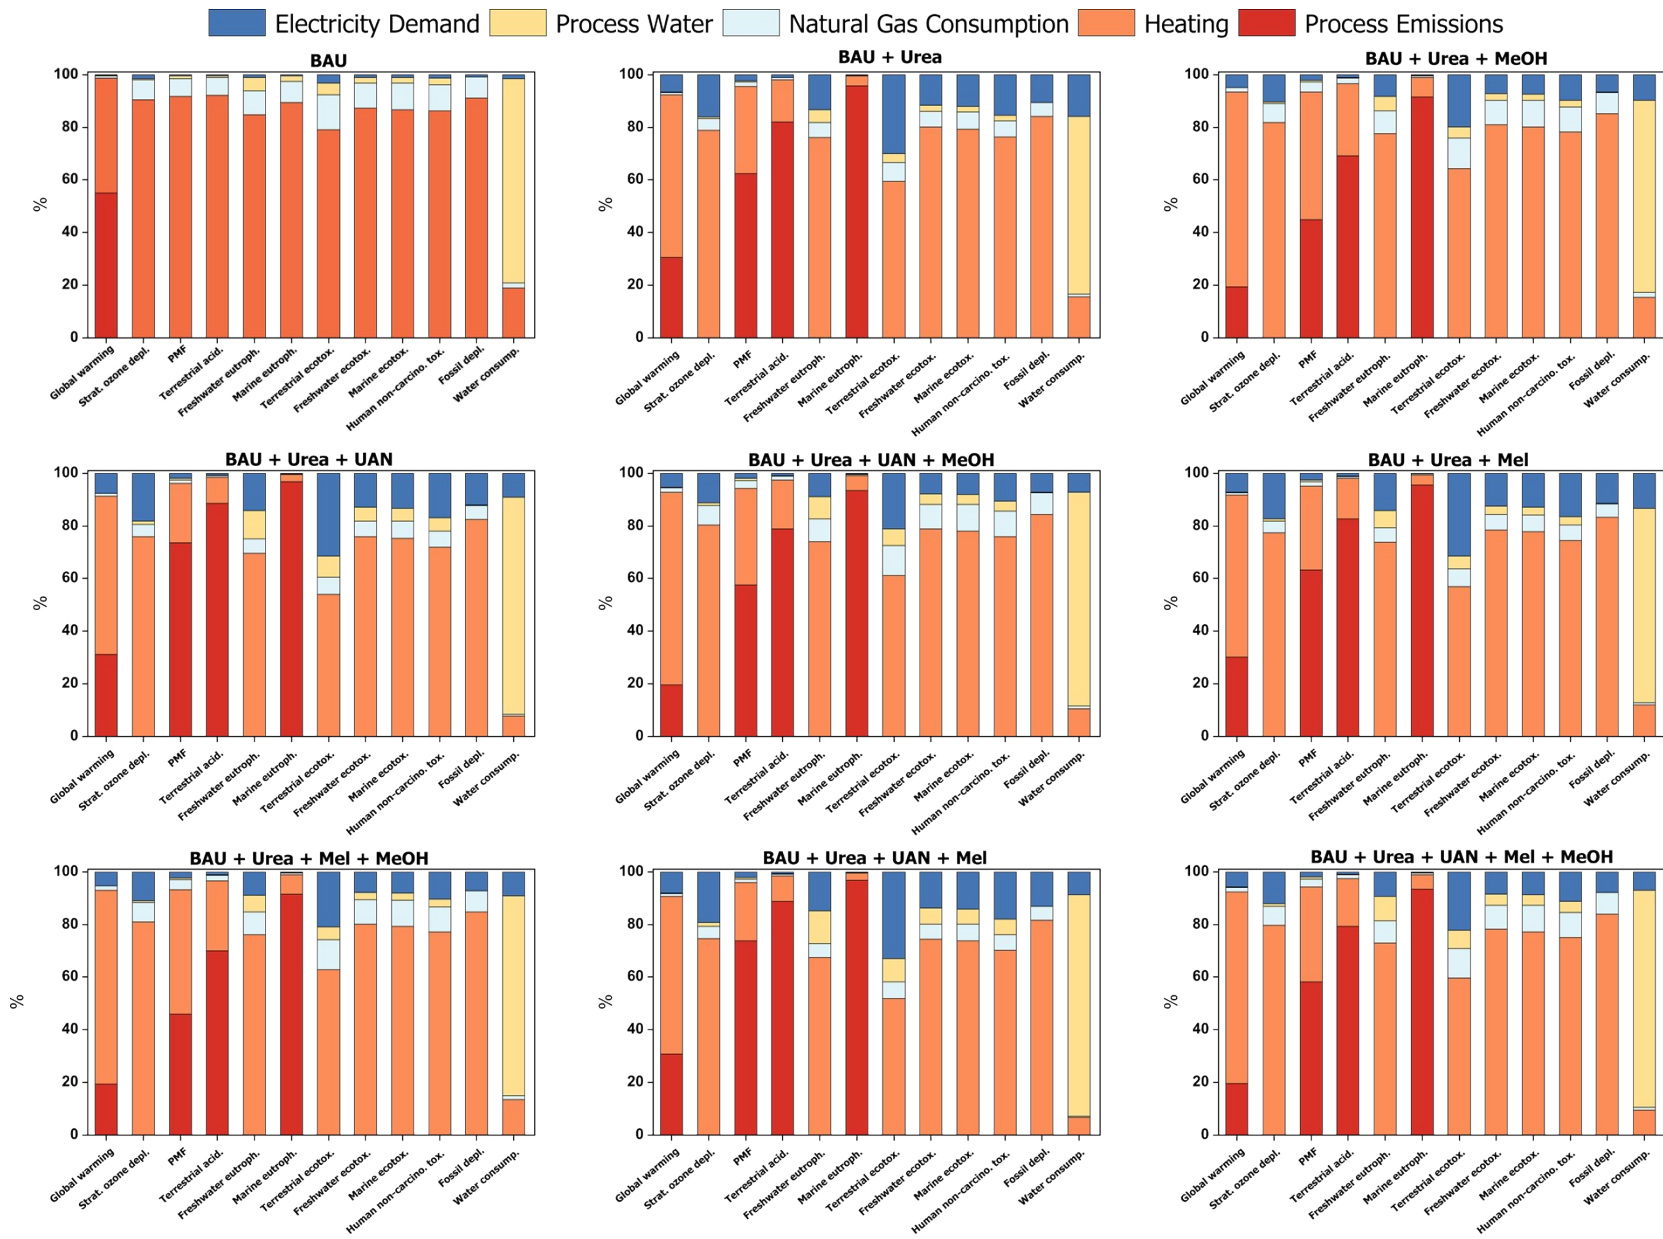

Figure S1: LCA contributonal analysis for viable pathways within the NH<sub>3</sub>-CO<sub>2</sub> integrated eco-park (ReCiPe 2016 Midpoint (H) V1.01).

From *Figure S1*, the LCA contributonal analysis was represented, where data across different impact categories were normalized to 100%. Heating gave the largest overall contributions to environmental burden- up to 92% across all impact categories. Significant contributions were observed for global warming (44 - 74%), stratospheric ozone depletion (75 - 90%), freshwater eutrophication (67 - 85%), terrestrial ecotoxicity (52% - 79%), freshwater ecotoxicity (74 - 87%), marine ecotoxicity (74 - 87%), human non-carcinogenic toxicity (70 - 86%) and fossil resource scarcity (82 - 91%). Environmental burdens were attributed to the release of toxic chemicals into the air, land and water courses during natural gas extraction and combustion. This was associated with steam production as well as energy needs, with natural gas combustion as the main energy source. This was especially observed across the BAU case, due to the highly energy intensive nature of the process<sup>14</sup>.

Upon expansion of the eco-park, the prevalence of process emissions as the secondary major contributor to environmental burden became more apparent as both CO<sub>2</sub> and NH<sub>3</sub> emissions increased for added processes. This was especially observed for fine particulate matter formation (45 – 74%), terrestrial acidification (69 – 89%) and marine eutrophication (91 – 97%) impact categories. These burdens were attributed to the direct release of NH<sub>3</sub> into the atmosphere. With respect to process-based impacts, CO<sub>2</sub> emissions derived from purge gas combustion considerably increased environmental burden- noticeable for global warming (19 - 55%). Minor burden contributions were also seen from water, natural gas consumption and electricity demand (<10%) across most cases.

## 5.0 PB Characterization Factors

*Table S16* shows the characterization factors (CF) used to align LCI entries to each Earth system in the PB-LCIA analysis.

**Table S16: Data sources for determining the characterized impact scores (IMP<sub>i</sub>).**

| Characterization factors (CF) used for evaluation of Impact Scores (IMP <sub>i</sub> ) <sup>16</sup> |                                              |                          |                                           |
|------------------------------------------------------------------------------------------------------|----------------------------------------------|--------------------------|-------------------------------------------|
| Environmental flow                                                                                   | Earth System Process                         | CF                       | Unit                                      |
| CO <sub>2</sub>                                                                                      | Climate Change-Energy Imbalance              | 3.53 x 10 <sup>-13</sup> | W yr m <sup>2</sup> kg <sup>-1</sup>      |
| CH <sub>4</sub>                                                                                      |                                              | 1.59 x 10 <sup>-12</sup> |                                           |
| N <sub>2</sub> O                                                                                     |                                              | 4.64 x 10 <sup>-11</sup> |                                           |
| CO <sub>2</sub>                                                                                      | Climate Change-CO <sub>2</sub> Concentration | 2.69 x 10 <sup>-11</sup> | ppm yr kg <sup>-1</sup>                   |
| CH <sub>4</sub>                                                                                      |                                              | 7.40 x 10 <sup>-11</sup> |                                           |
| CO <sub>2</sub>                                                                                      | Ocean Acidification                          | 8.22 x 10 <sup>-14</sup> | mol yr kg <sup>-1</sup>                   |
| CH <sub>4</sub>                                                                                      |                                              | 2.26 x 10 <sup>-13</sup> |                                           |
| N <sub>2</sub> O <sup>a</sup>                                                                        | Stratospheric Ozone Depletion                | 7.85 x 10 <sup>-9</sup>  | W yr m <sup>2</sup> kg <sup>-1</sup>      |
| Global P flows                                                                                       | Biogeochemical Flows-Phosphorus              | 8.61 x 10 <sup>-10</sup> | Tg P yr <sup>-1</sup> kg <sup>-1</sup> yr |
| Total N Flow                                                                                         | Biogeochemical Flows- Nitrogen               | 2.44 x 10 <sup>-8</sup>  | Tg N yr <sup>-1</sup> kg <sup>-1</sup> yr |
| NO <sub>3</sub> <sup>-</sup>                                                                         |                                              | 5.51 x 10 <sup>-9</sup>  | Tg N yr <sup>-1</sup> kg <sup>-1</sup> yr |
| Consumption of Blue Water                                                                            | Freshwater Use                               | 1 x 10 <sup>-9</sup>     | km <sup>3</sup> m <sup>-3</sup>           |
| Global Forest Transformation                                                                         | Land-System Change                           | 1.56 x 10 <sup>-12</sup> | % m <sup>-2</sup>                         |

<sup>a</sup> Converted to CFC-11 equivalent (0.0118 kg of CFC-11 equivalent per kg of N<sub>2</sub>O) to apply CF for CFC-11<sup>17</sup>

## 6.0 Sustainability Analysis

The normalized environmental impacts across the various scenarios are given in **Tables 17 - 19**. They highlight six impact categories, namely: global warming, stratospheric ozone depletion, freshwater eutrophication, marine eutrophication, human non-carcinogenic toxicity and fossil resource scarcity. **Tables S17 and S18** compare the BAU case with scenarios including and excluding MeOH respectively. The most environmentally sustainable networks were then selected based on minimum internal area (**Table S19**), and assessed to determine the most sustainable scenario.

**Table S17: Normalized sustainability indicators for comparison of BAU case to scenarios with MeOH**

| Category                        | Scenarios |                   |                         |                         |                               |
|---------------------------------|-----------|-------------------|-------------------------|-------------------------|-------------------------------|
|                                 | BAU       | BAU + Urea + MeOH | BAU + Urea + UAN + MeOH | BAU + Urea + Mel + MeOH | BAU + Urea + UAN + Mel + MeOH |
| Global warming                  | 100%      | 34%               | 31%                     | 33%                     | 29%                           |
| Stratospheric ozone depletion   | 100%      | 63%               | 58%                     | 61%                     | 56%                           |
| Freshwater eutrophication       | 100%      | 63%               | 59%                     | 61%                     | 57%                           |
| Marine eutrophication           | 12%       | 83%               | 100%                    | 80%                     | 94%                           |
| Human non-carcinogenic toxicity | 100%      | 63%               | 59%                     | 61%                     | 56%                           |
| Fossil resource scarcity        | 100%      | 61%               | 56%                     | 59%                     | 53%                           |
| ROI (reverse score)             | 100%      | 1%                | 1%                      | 1%                      | 1%                            |
| Job creation (reverse score)    | 100%      | 39%               | 30%                     | 29%                     | 24%                           |

**Table S18: Normalized sustainability indicators for comparison of BAU case to scenarios without MeOH**

| Category                        | Scenarios |            |                  |                  |                        |
|---------------------------------|-----------|------------|------------------|------------------|------------------------|
|                                 | BAU       | BAU + Urea | BAU + Urea + UAN | BAU + Urea + Mel | BAU + Urea + UAN + Mel |
| Global warming                  | 100%      | 72%        | 54%              | 62%              | 46%                    |
| Stratospheric ozone depletion   | 86%       | 100%       | 76%              | 88%              | 65%                    |
| Freshwater eutrophication       | 88%       | 100%       | 81%              | 89%              | 70%                    |
| Marine eutrophication           | 4%        | 99%        | 100%             | 84%              | 83%                    |
| Human non-carcinogenic toxicity | 87%       | 100%       | 78%              | 88%              | 67%                    |
| Fossil resource scarcity        | 91%       | 100%       | 75%              | 87%              | 64%                    |
| ROI (reverse score)             | 100%      | 5%         | 5%               | 8%               | 5%                     |
| Job creation (reverse score)    | 100%      | 58%        | 40%              | 39%              | 30%                    |

**Table S19: Normalized sustainability indicators for comparison of BAU case to best case scenarios**

| Category                        | Scenarios |                         |                  |                               |                        |
|---------------------------------|-----------|-------------------------|------------------|-------------------------------|------------------------|
|                                 | BAU       | BAU + Urea + Mel + MeOH | BAU + Urea + UAN | BAU + Urea + UAN + Mel + MeOH | BAU + Urea + UAN + Mel |
| Global warming                  | 100%      | 33%                     | 54%              | 29%                           | 46%                    |
| Stratospheric ozone depletion   | 100%      | 61%                     | 89%              | 56%                           | 76%                    |
| Freshwater eutrophication       | 100%      | 61%                     | 91%              | 57%                           | 79%                    |
| Marine eutrophication           | 4%        | 27%                     | 100%             | 32%                           | 83%                    |
| Human non-carcinogenic toxicity | 100%      | 61%                     | 90%              | 56%                           | 77%                    |
| Fossil resource scarcity        | 100%      | 59%                     | 83%              | 53%                           | 70%                    |
| ROI (reverse score)             | 100%      | 1%                      | 5%               | 1%                            | 5%                     |
| Job creation (reverse score)    | 100%      | 29%                     | 40%              | 24%                           | 30%                    |

## 7.0 LCA and PB Limitations and Sensitivities

### 7.1 LCA Sensitivities

The cradle to gate LCA was utilized to identify the environmental impacts of the viable pathways. The analysis was performed on SimaPro using the ReCiPe midpoint approach. In conducting this assessment, a sensitivity analysis of the method was performed, comparing the selected method to ReCiPe 2016 Endpoint (H) v1.01, with scenario specific contributonal analyses compared (**Tables S20 – S28**).

The ReCiPe Endpoint Hierarchist version 1.01 / World method comprised 12 impact categories; global warming, human health (Climate change (HH)), global warming, terrestrial ecosystems (Climate change (eco)), stratospheric ozone depletion (strat. ozone depl.), fine particulate matter formation (PMF), terrestrial acidification (terrestrial acid.), freshwater eutrophication (freshwater eutroph.), marine eutrophication (marine eutroph.), terrestrial ecotoxicity (terrestrial ecotox.), freshwater ecotoxicity (freshwater ecotox.), marine ecotoxicity (marine ecotox.), human non-carcinogenic toxicity (human non-carcino. tox.) and fossil resource scarcity (fossil depl.). Comparing **Figures S1 and S2**, the impact categories examined for both midpoint and endpoint methods gave similar results (not exceeding sensitivity threshold of 1%) towards the characterization of environmental burden for all scenarios. Thus, the characterization model was not a factor of sensitivity for evaluating the environmental profiles across integrated networks.

Furthermore, insights into the allocation approach used to attribute burdens to co-products was investigated for the BAU + Urea + UAN+ Mel + MeOH case. As shown in **Figure S3**, economic allocation gives the lowest fraction of environmental burdens across all categories to ammonia production, with mass allocation increasing the burden by 11.6% and energy allocation by 57.9%. Although economic allocation was used in this particular study in accordance with past research<sup>18-20</sup>, these results illustrate the limitations of the underlying allocation approach on assessing environmental profiles and informing decision-making.



**Table S20: Characterized LCIA profile for BAU scenario (ReCiPe 2016 Endpoint (H) V1.01)**

| <b>Impact category</b>                 | <b>Unit</b>                   | <b>Total</b> | <b>Process Emissions</b> | <b>Heating</b> | <b>Natural Gas Consumption</b> | <b>Process Water</b> | <b>Electricity Demand</b> |
|----------------------------------------|-------------------------------|--------------|--------------------------|----------------|--------------------------------|----------------------|---------------------------|
| Global warming, Human health           | DALYx10 <sup>-6</sup>         | 2552         | 1402                     | 1116           | 23.10                          | 1.37                 | 9.44                      |
| Global warming, Terrestrial ecosystems | species.yrx10 <sup>-8</sup>   | 770.17       | 423.08                   | 336.84         | 6.98                           | 0.41                 | 2.85                      |
| Stratospheric ozone depletion          | DALYx10 <sup>-8</sup>         | 9.82         | 0.00                     | 8.88           | 0.74                           | 0.06                 | 0.14                      |
| Fine particulate matter formation      | DALYx10 <sup>-6</sup>         | 190.61       | 0.00                     | 174.66         | 12.87                          | 2.06                 | 1.02                      |
| Terrestrial acidification              | species.yr x10 <sup>-9</sup>  | 192.30       | 0.00                     | 177.00         | 12.94                          | 1.17                 | 0.89                      |
| Freshwater eutrophication              | species.yr x10 <sup>-10</sup> | 85.44        | 0.00                     | 72.41          | 7.67                           | 4.37                 | 0.99                      |
| Marine eutrophication                  | species.yr x10 <sup>-13</sup> | 39.38        | 0.00                     | 35.22          | 3.18                           | 0.83                 | 0.15                      |
| Terrestrial ecotoxicity                | species.yr x10 <sup>-11</sup> | 71.43        | 0.00                     | 56.46          | 9.59                           | 3.15                 | 2.23                      |
| Freshwater ecotoxicity                 | species.yr x10 <sup>-10</sup> | 11.77        | 0.00                     | 10.28          | 1.10                           | 0.27                 | 0.12                      |
| Marine ecotoxicity                     | species.yr x10 <sup>-11</sup> | 25.89        | 0.00                     | 22.41          | 2.64                           | 0.57                 | 0.27                      |
| Human non-carcinogenic toxicity        | DALYx10 <sup>-6</sup>         | 9.41         | 0.00                     | 8.12           | 0.94                           | 0.22                 | 0.13                      |
| Fossil resource scarcity               | USD2013                       | 170.38       | 0.00                     | 155.09         | 13.68                          | 0.07                 | 1.54                      |
| Water consumption, Human health        | DALYx10 <sup>-8</sup>         | 260.90       | 0.00                     | 49.47          | 5.20                           | 202.20               | 3.95                      |

**Table S21: Characterized LCIA profile for BAU + Urea + MeOH scenario (ReCiPe 2016 Endpoint (H) V1.01)**

| <b>Impact category</b>                 | <b>Unit</b>                   | <b>Total</b> | <b>Process Emissions</b> | <b>Heating</b> | <b>Natural Gas Consumption</b> | <b>Process Water</b> | <b>Electricity Demand</b> |
|----------------------------------------|-------------------------------|--------------|--------------------------|----------------|--------------------------------|----------------------|---------------------------|
| Global warming, Human health           | DALYx10 <sup>-6</sup>         | 864.32       | 168.28                   | 638.61         | 14.14                          | 0.91                 | 42.38                     |
| Global warming, Terrestrial ecosystems | species.yrx10 <sup>-7</sup>   | 26.08        | 5.08                     | 19.27          | 0.43                           | 0.03                 | 1.28                      |
| Stratospheric ozone depletion          | DALYx10 <sup>-8</sup>         | 6.21         | 0.00                     | 5.08           | 0.45                           | 0.04                 | 0.64                      |
| Fine particulate matter formation      | DALYx10 <sup>-4</sup>         | 2.07         | 0.93                     | 0.99           | 0.08                           | 0.01                 | 0.05                      |
| Terrestrial acidification              | species.yr x10 <sup>-9</sup>  | 370.66       | 256.51                   | 101.45         | 7.92                           | 0.77                 | 4.01                      |
| Freshwater eutrophication              | species.yr x10 <sup>-10</sup> | 53.46        | 0.00                     | 41.43          | 4.70                           | 2.89                 | 4.45                      |
| Marine eutrophication                  | species.yr x10 <sup>-13</sup> | 276.16       | 252.83                   | 20.15          | 1.95                           | 0.55                 | 0.69                      |
| Terrestrial ecotoxicity                | species.yr x10 <sup>-11</sup> | 50.28        | 0.00                     | 32.30          | 5.87                           | 2.08                 | 10.03                     |
| Freshwater ecotoxicity                 | species.yr x10 <sup>-10</sup> | 7.26         | 0.00                     | 5.88           | 0.67                           | 0.18                 | 0.53                      |
| Marine ecotoxicity                     | species.yr x10 <sup>-11</sup> | 16.02        | 0.00                     | 12.82          | 1.62                           | 0.38                 | 1.20                      |
| Human non-carcinogenic toxicity        | DALYx10 <sup>-6</sup>         | 5.94         | 0.00                     | 4.65           | 0.57                           | 0.15                 | 0.58                      |
| Fossil resource scarcity               | USD2013                       | 104.07       | 0.00                     | 88.73          | 8.38                           | 0.05                 | 6.91                      |
| Water consumption, Human health        | DALYx10 <sup>-8</sup>         | 182.78       | 0.00                     | 28.30          | 3.19                           | 133.58               | 17.71                     |

**Table S22: Characterized LCIA profile for BAU + Urea scenario (ReCiPe 2016 Endpoint (H) V1.01)**

| <b>Impact category</b>                 | <b>Unit</b>                   | <b>Total</b> | <b>Process Emissions</b> | <b>Heating</b> | <b>Natural Gas Consumption</b> | <b>Process Water</b> | <b>Electricity Demand</b> |
|----------------------------------------|-------------------------------|--------------|--------------------------|----------------|--------------------------------|----------------------|---------------------------|
| Global warming, Human health           | DALYx10 <sup>-6</sup>         | 1836.07      | 561.20                   | 1134.82        | 16.43                          | 1.48                 | 122.15                    |
| Global warming, Terrestrial ecosystems | species.yrx10 <sup>-7</sup>   | 55.41        | 16.93                    | 34.25          | 0.50                           | 0.04                 | 3.69                      |
| Stratospheric ozone depletion          | DALYx10 <sup>-8</sup>         | 11.46        | 0.00                     | 9.03           | 0.53                           | 0.06                 | 1.85                      |
| Fine particulate matter formation      | DALYx10 <sup>-4</sup>         | 5.39         | 3.37                     | 1.78           | 0.09                           | 0.02                 | 0.13                      |
| Terrestrial acidification              | species.yr x10 <sup>-8</sup>  | 113.55       | 92.82                    | 18.03          | 0.92                           | 0.13                 | 1.16                      |
| Freshwater eutrophication              | species.yr x10 <sup>-9</sup>  | 9.66         | 0.00                     | 7.36           | 0.55                           | 0.47                 | 1.28                      |
| Marine eutrophication                  | species.yr x10 <sup>-13</sup> | 955.78       | 914.83                   | 35.81          | 2.26                           | 0.89                 | 1.99                      |
| Terrestrial ecotoxicity                | species.yr x10 <sup>-11</sup> | 96.51        | 0.00                     | 57.40          | 6.82                           | 3.39                 | 28.90                     |
| Freshwater ecotoxicity                 | species.yr x10 <sup>-10</sup> | 13.05        | 0.00                     | 10.45          | 0.78                           | 0.29                 | 1.53                      |
| Marine ecotoxicity                     | species.yr x10 <sup>-11</sup> | 28.74        | 0.00                     | 22.79          | 1.88                           | 0.61                 | 3.46                      |
| Human non-carcinogenic toxicity        | DALYx10 <sup>-6</sup>         | 10.83        | 0.00                     | 8.26           | 0.66                           | 0.24                 | 1.67                      |
| Fossil resource scarcity               | USD2013                       | 187.41       | 0.00                     | 157.68         | 9.73                           | 0.08                 | 19.93                     |
| Water consumption, Human health        | DALYx10 <sup>-7</sup>         | 32.28        | 0.00                     | 5.03           | 0.37                           | 21.78                | 5.11                      |

**Table S23: Characterized LCIA profile for BAU + Urea + UAN + MeOH scenario (ReCiPe 2016 Endpoint (H) V1.01)**

| <b>Impact category</b>                 | <b>Unit</b>                   | <b>Total</b> | <b>Process Emissions</b> | <b>Heating</b> | <b>Natural Gas Consumption</b> | <b>Process Water</b> | <b>Electricity Demand</b> |
|----------------------------------------|-------------------------------|--------------|--------------------------|----------------|--------------------------------|----------------------|---------------------------|
| Global warming, Human health           | DALYx10 <sup>-5</sup>         | 79.01        | 15.57                    | 57.73          | 1.31                           | 0.13                 | 4.26                      |
| Global warming, Terrestrial ecosystems | species.yrx10 <sup>-7</sup>   | 23.84        | 4.70                     | 17.42          | 0.40                           | 0.04                 | 1.29                      |
| Stratospheric ozone depletion          | DALYx10 <sup>-8</sup>         | 5.71         | 0.00                     | 4.59           | 0.42                           | 0.06                 | 0.64                      |
| Fine particulate matter formation      | DALYx10 <sup>-5</sup>         | 24.59        | 14.17                    | 9.03           | 0.73                           | 0.20                 | 0.46                      |
| Terrestrial acidification              | species.yr x10 <sup>-9</sup>  | 494.49       | 390.27                   | 91.71          | 7.33                           | 1.15                 | 4.03                      |
| Freshwater eutrophication              | species.yr x10 <sup>-10</sup> | 50.56        | 0.00                     | 37.45          | 4.35                           | 4.29                 | 4.47                      |
| Marine eutrophication                  | species.yr x10 <sup>-13</sup> | 331.46       | 309.93                   | 18.22          | 1.80                           | 0.81                 | 0.69                      |
| Terrestrial ecotoxicity                | species.yr x10 <sup>-11</sup> | 47.81        | 0.00                     | 29.20          | 5.43                           | 3.09                 | 10.08                     |
| Freshwater ecotoxicity                 | species.yr x10 <sup>-10</sup> | 6.74         | 0.00                     | 5.32           | 0.62                           | 0.26                 | 0.53                      |
| Marine ecotoxicity                     | species.yr x10 <sup>-11</sup> | 14.86        | 0.00                     | 11.59          | 1.50                           | 0.56                 | 1.21                      |
| Human non-carcinogenic toxicity        | DALYx10 <sup>-6</sup>         | 5.53         | 0.00                     | 4.20           | 0.53                           | 0.22                 | 0.58                      |
| Fossil resource scarcity               | USD2013                       | 94.99        | 0.00                     | 80.21          | 7.75                           | 0.07                 | 6.95                      |
| Water consumption, Human health        | DALYx10 <sup>-8</sup>         | 244.88       | 0.00                     | 25.58          | 2.95                           | 198.53               | 17.81                     |

**Table S24: Characterized LCIA profile for BAU + Urea + UAN scenario (ReCiPe 2016 Endpoint (H) V1.01)**

| <b>Impact category</b>                 | <b>Unit</b>                   | <b>Total</b> | <b>Process Emissions</b> | <b>Heating</b> | <b>Natural Gas Consumption</b> | <b>Process Water</b> | <b>Electricity Demand</b> |
|----------------------------------------|-------------------------------|--------------|--------------------------|----------------|--------------------------------|----------------------|---------------------------|
| Global warming, Human health           | DALYx10 <sup>-4</sup>         | 13.90        | 4.34                     | 8.36           | 0.13                           | 0.03                 | 1.05                      |
| Global warming, Terrestrial ecosystems | species.yrx10 <sup>-7</sup>   | 41.94        | 13.09                    | 25.22          | 0.38                           | 0.08                 | 3.16                      |
| Stratospheric ozone depletion          | DALYx10 <sup>-8</sup>         | 8.75         | 0.00                     | 6.65           | 0.41                           | 0.11                 | 1.59                      |
| Fine particulate matter formation      | DALYx10 <sup>-5</sup>         | 58.15        | 42.82                    | 13.08          | 0.71                           | 0.40                 | 1.14                      |
| Terrestrial acidification              | species.yr x10 <sup>-9</sup>  | 1331.87      | 1179.79                  | 132.78         | 7.12                           | 2.28                 | 9.90                      |
| Freshwater eutrophication              | species.yr x10 <sup>-9</sup>  | 7.80         | 0.00                     | 5.42           | 0.42                           | 0.85                 | 1.10                      |
| Marine eutrophication                  | species.yr x10 <sup>-13</sup> | 968.37       | 936.92                   | 26.38          | 1.75                           | 1.62                 | 1.70                      |
| Terrestrial ecotoxicity                | species.yr x10 <sup>-11</sup> | 78.47        | 0.00                     | 42.28          | 5.27                           | 6.15                 | 24.77                     |
| Freshwater ecotoxicity                 | species.yr x10 <sup>-10</sup> | 10.14        | 0.00                     | 7.70           | 0.60                           | 0.53                 | 1.31                      |
| Marine ecotoxicity                     | species.yr x10 <sup>-11</sup> | 22.32        | 0.00                     | 16.78          | 1.45                           | 1.11                 | 2.97                      |
| Human non-carcinogenic toxicity        | DALYx10 <sup>-6</sup>         | 8.46         | 0.00                     | 6.08           | 0.51                           | 0.44                 | 1.43                      |
| Fossil resource scarcity               | USD2013                       | 140.88       | 0.00                     | 116.14         | 7.52                           | 0.14                 | 17.08                     |
| Water consumption, Human health        | DALYx10 <sup>-8</sup>         | 478.45       | 0.00                     | 37.04          | 2.86                           | 394.78               | 43.76                     |

**Table S25: Characterized LCIA profile for BAU + Urea + Mel + MeOH scenario (ReCiPe 2016 Endpoint (H) V1.01)**

| <b>Impact category</b>                 | <b>Unit</b>                    | <b>Total</b> | <b>Process Emissions</b> | <b>Heating</b> | <b>Natural Gas Consumption</b> | <b>Process Water</b> | <b>Electricity Demand</b> |
|----------------------------------------|--------------------------------|--------------|--------------------------|----------------|--------------------------------|----------------------|---------------------------|
| Global warming, Human health           | DALY x 10 <sup>-6</sup>        | 831.29       | 160.68                   | 612.19         | 13.50                          | 1.04                 | 43.89                     |
| Global warming, Terrestrial ecosystems | species.yrx10 <sup>-7</sup>    | 25.09        | 4.85                     | 18.47          | 0.41                           | 0.03                 | 1.32                      |
| Stratospheric ozone depletion          | DALY x 10 <sup>-8</sup>        | 6.01         | 0.00                     | 4.87           | 0.43                           | 0.04                 | 0.66                      |
| Fine particulate matter formation      | DALYx10 <sup>-5</sup>          | 20.32        | 9.36                     | 9.58           | 0.75                           | 0.16                 | 0.48                      |
| Terrestrial acidification              | species.yr x 10 <sup>-9</sup>  | 367.70       | 257.85                   | 97.25          | 7.57                           | 0.88                 | 4.15                      |
| Freshwater eutrophication              | species.yr x 10 <sup>-10</sup> | 52.10        | 0.00                     | 39.72          | 4.48                           | 3.30                 | 4.60                      |
| Marine eutrophication                  | species.yr x 10 <sup>-13</sup> | 263.92       | 241.41                   | 19.32          | 1.86                           | 0.63                 | 0.71                      |
| Terrestrial ecotoxicity                | species.yr x 10 <sup>-11</sup> | 49.33        | 0.00                     | 30.97          | 5.60                           | 2.38                 | 10.38                     |
| Freshwater ecotoxicity                 | species.yr x 10 <sup>-10</sup> | 7.03         | 0.00                     | 5.64           | 0.64                           | 0.20                 | 0.55                      |
| Marine ecotoxicity                     | species.yr x 10 <sup>-11</sup> | 15.51        | 0.00                     | 12.29          | 1.55                           | 0.43                 | 1.24                      |
| Human non-carcinogenic toxicity        | DALY x 10 <sup>-6</sup>        | 5.77         | 0.00                     | 4.45           | 0.55                           | 0.17                 | 0.60                      |
| Fossil resource scarcity               | USD2013                        | 100.27       | 0.00                     | 85.06          | 8.00                           | 0.05                 | 7.16                      |
| Water consumption, Human health        | DALY x 10 <sup>-8</sup>        | 201.33       | 0.00                     | 27.13          | 3.04                           | 152.82               | 18.34                     |

**Table S26: Characterized LCIA profile for BAU + Urea + Mel scenario (ReCiPe 2016 Endpoint (H) V1.01)**

| <b>Impact category</b>                 | <b>Unit</b>                    | <b>Total</b> | <b>Process Emissions</b> | <b>Heating</b> | <b>Natural Gas Consumption</b> | <b>Process Water</b> | <b>Electricity Demand</b> |
|----------------------------------------|--------------------------------|--------------|--------------------------|----------------|--------------------------------|----------------------|---------------------------|
| Global warming, Human health           | DALY x 10 <sup>-6</sup>        | 1587.06      | 479.15                   | 976.71         | 14.03                          | 1.81                 | 115.36                    |
| Global warming, Terrestrial ecosystems | species.yrx10 <sup>-7</sup>    | 47.89        | 14.46                    | 29.48          | 0.42                           | 0.05                 | 3.48                      |
| Stratospheric ozone depletion          | DALY x 10 <sup>-8</sup>        | 10.04        | 0.00                     | 7.77           | 0.45                           | 0.07                 | 1.75                      |
| Fine particulate matter formation      | DALYx10 <sup>-5</sup>          | 47.87        | 30.28                    | 15.28          | 0.78                           | 0.27                 | 1.25                      |
| Terrestrial acidification              | species.yr x 10 <sup>-9</sup>  | 1009.76      | 834.29                   | 155.16         | 7.86                           | 1.55                 | 10.91                     |
| Freshwater eutrophication              | species.yr x 10 <sup>-10</sup> | 85.91        | 0.00                     | 63.36          | 4.66                           | 5.78                 | 12.10                     |
| Marine eutrophication                  | species.yr x 10 <sup>-13</sup> | 816.80       | 781.08                   | 30.82          | 1.93                           | 1.10                 | 1.88                      |
| Terrestrial ecotoxicity                | species.yr x 10 <sup>-11</sup> | 86.69        | 0.00                     | 49.40          | 5.82                           | 4.17                 | 27.29                     |
| Freshwater ecotoxicity                 | species.yr x 10 <sup>-10</sup> | 11.46        | 0.00                     | 8.99           | 0.67                           | 0.36                 | 1.44                      |
| Marine ecotoxicity                     | species.yr x 10 <sup>-11</sup> | 25.24        | 0.00                     | 19.61          | 1.61                           | 0.75                 | 3.27                      |
| Human non-carcinogenic toxicity        | DALY x 10 <sup>-6</sup>        | 9.54         | 0.00                     | 7.11           | 0.57                           | 0.29                 | 1.57                      |
| Fossil resource scarcity               | USD2013                        | 162.93       | 0.00                     | 135.71         | 8.31                           | 0.09                 | 18.82                     |
| Water consumption, Human health        | DALY x 10 <sup>-8</sup>        | 362.32       | 0.00                     | 43.29          | 3.16                           | 267.67               | 48.21                     |

**Table S27: Characterized LCIA profile for BAU + Urea + UAN + Mel + MeOH scenario (ReCiPe 2016 Endpoint (H) V1.01)**

| <b>Impact category</b>                 | <b>Unit</b>                    | <b>Total</b> | <b>Process Emissions</b> | <b>Heating</b> | <b>Natural Gas Consumption</b> | <b>Process Water</b> | <b>Electricity Demand</b> |
|----------------------------------------|--------------------------------|--------------|--------------------------|----------------|--------------------------------|----------------------|---------------------------|
| Global warming, Human health           | DALY x 10 <sup>-6</sup>        | 750.18       | 146.80                   | 546.32         | 12.34                          | 1.42                 | 43.30                     |
| Global warming, Terrestrial ecosystems | species.yrx10 <sup>-7</sup>    | 22.64        | 4.43                     | 16.49          | 0.37                           | 0.04                 | 1.31                      |
| Stratospheric ozone depletion          | DALY x 10 <sup>-8</sup>        | 5.45         | 0.00                     | 4.35           | 0.39                           | 0.06                 | 0.66                      |
| Fine particulate matter formation      | DALYx10 <sup>-5</sup>          | 23.71        | 13.79                    | 8.55           | 0.69                           | 0.21                 | 0.47                      |
| Terrestrial acidification              | species.yr x 10 <sup>-9</sup>  | 478.80       | 379.80                   | 86.79          | 6.91                           | 1.21                 | 4.09                      |
| Freshwater eutrophication              | species.yr x 10 <sup>-10</sup> | 48.62        | 0.00                     | 35.44          | 4.09                           | 4.54                 | 4.54                      |
| Marine eutrophication                  | species.yr x 10 <sup>-13</sup> | 312.63       | 292.12                   | 17.24          | 1.70                           | 0.86                 | 0.70                      |
| Terrestrial ecotoxicity                | species.yr x 10 <sup>-11</sup> | 46.27        | 0.00                     | 27.63          | 5.12                           | 3.28                 | 10.24                     |
| Freshwater ecotoxicity                 | species.yr x 10 <sup>-10</sup> | 6.44         | 0.00                     | 5.03           | 0.59                           | 0.28                 | 0.54                      |
| Marine ecotoxicity                     | species.yr x 10 <sup>-11</sup> | 14.20        | 0.00                     | 10.97          | 1.41                           | 0.59                 | 1.23                      |
| Human non-carcinogenic toxicity        | DALY x 10 <sup>-6</sup>        | 5.30         | 0.00                     | 3.97           | 0.50                           | 0.23                 | 0.59                      |
| Fossil resource scarcity               | USD2013                        | 90.35        | 0.00                     | 75.91          | 7.31                           | 0.07                 | 7.06                      |
| Water consumption, Human health        | DALY x 10 <sup>-8</sup>        | 255.29       | 0.00                     | 24.21          | 2.78                           | 210.20               | 18.09                     |



**Table S28: Characterized LCIA profile for BAU + Urea + UAN + Mel scenario (ReCiPe 2016 Endpoint (H) V1.01)**

| <b>Impact category</b>                 | <b>Unit</b>                    | <b>Total</b> | <b>Process Emissions</b> | <b>Heating</b> | <b>Natural Gas Consumption</b> | <b>Process Water</b> | <b>Electricity Demand</b> |
|----------------------------------------|--------------------------------|--------------|--------------------------|----------------|--------------------------------|----------------------|---------------------------|
| Global warming, Human health           | DALY x 10 <sup>-6</sup>        | 1169.34      | 360.52                   | 700.30         | 10.55                          | 2.64                 | 95.33                     |
| Global warming, Terrestrial ecosystems | species.yrx10 <sup>-7</sup>    | 35.29        | 10.88                    | 21.13          | 0.32                           | 0.08                 | 2.88                      |
| Stratospheric ozone depletion          | DALY x 10 <sup>-8</sup>        | 7.46         | 0.00                     | 5.57           | 0.34                           | 0.11                 | 1.44                      |
| Fine particulate matter formation      | DALYx10 <sup>-5</sup>          | 49.71        | 36.73                    | 10.96          | 0.59                           | 0.40                 | 1.03                      |
| Terrestrial acidification              | species.yr x 10 <sup>-9</sup>  | 1140.44      | 1012.02                  | 111.25         | 5.91                           | 2.25                 | 9.01                      |
| Freshwater eutrophication              | species.yr x 10 <sup>-10</sup> | 67.35        | 0.00                     | 45.43          | 3.50                           | 8.41                 | 10.00                     |
| Marine eutrophication                  | species.yr x 10 <sup>-13</sup> | 805.10       | 778.40                   | 22.10          | 1.45                           | 1.59                 | 1.55                      |
| Terrestrial ecotoxicity                | species.yr x 10 <sup>-11</sup> | 68.42        | 0.00                     | 35.42          | 4.38                           | 6.07                 | 22.55                     |
| Freshwater ecotoxicity                 | species.yr x 10 <sup>-10</sup> | 8.66         | 0.00                     | 6.45           | 0.50                           | 0.52                 | 1.19                      |
| Marine ecotoxicity                     | species.yr x 10 <sup>-11</sup> | 19.07        | 0.00                     | 14.06          | 1.21                           | 1.10                 | 2.70                      |
| Human non-carcinogenic toxicity        | DALY x 10 <sup>-6</sup>        | 7.25         | 0.00                     | 5.09           | 0.43                           | 0.43                 | 1.30                      |
| Fossil resource scarcity               | USD2013                        | 119.24       | 0.00                     | 97.30          | 6.25                           | 0.14                 | 15.55                     |
| Water consumption, Human health        | DALY x 10 <sup>-8</sup>        | 462.74       | 0.00                     | 31.04          | 2.38                           | 389.49               | 39.84                     |

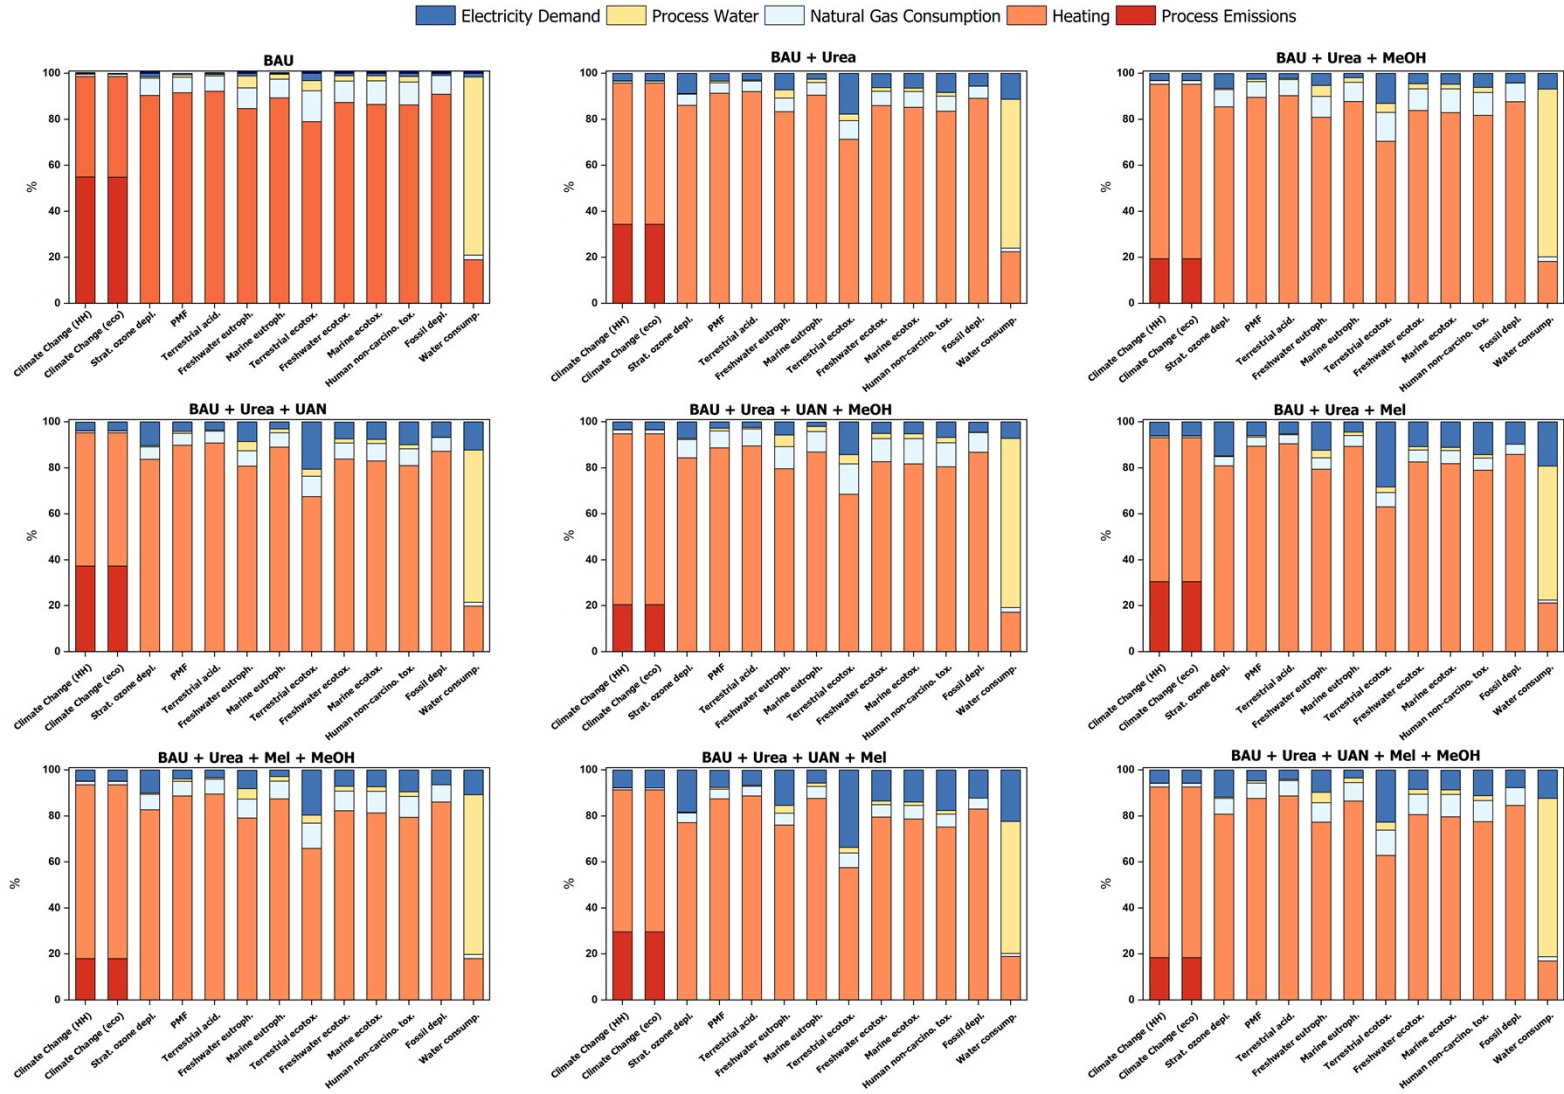

Fig

re S2: LCA contributonal analysis for viable pathways within the NH<sub>3</sub>-CO<sub>2</sub> integrated eco-park (ReCiPe 2016 Endpoint (H) v1.01)

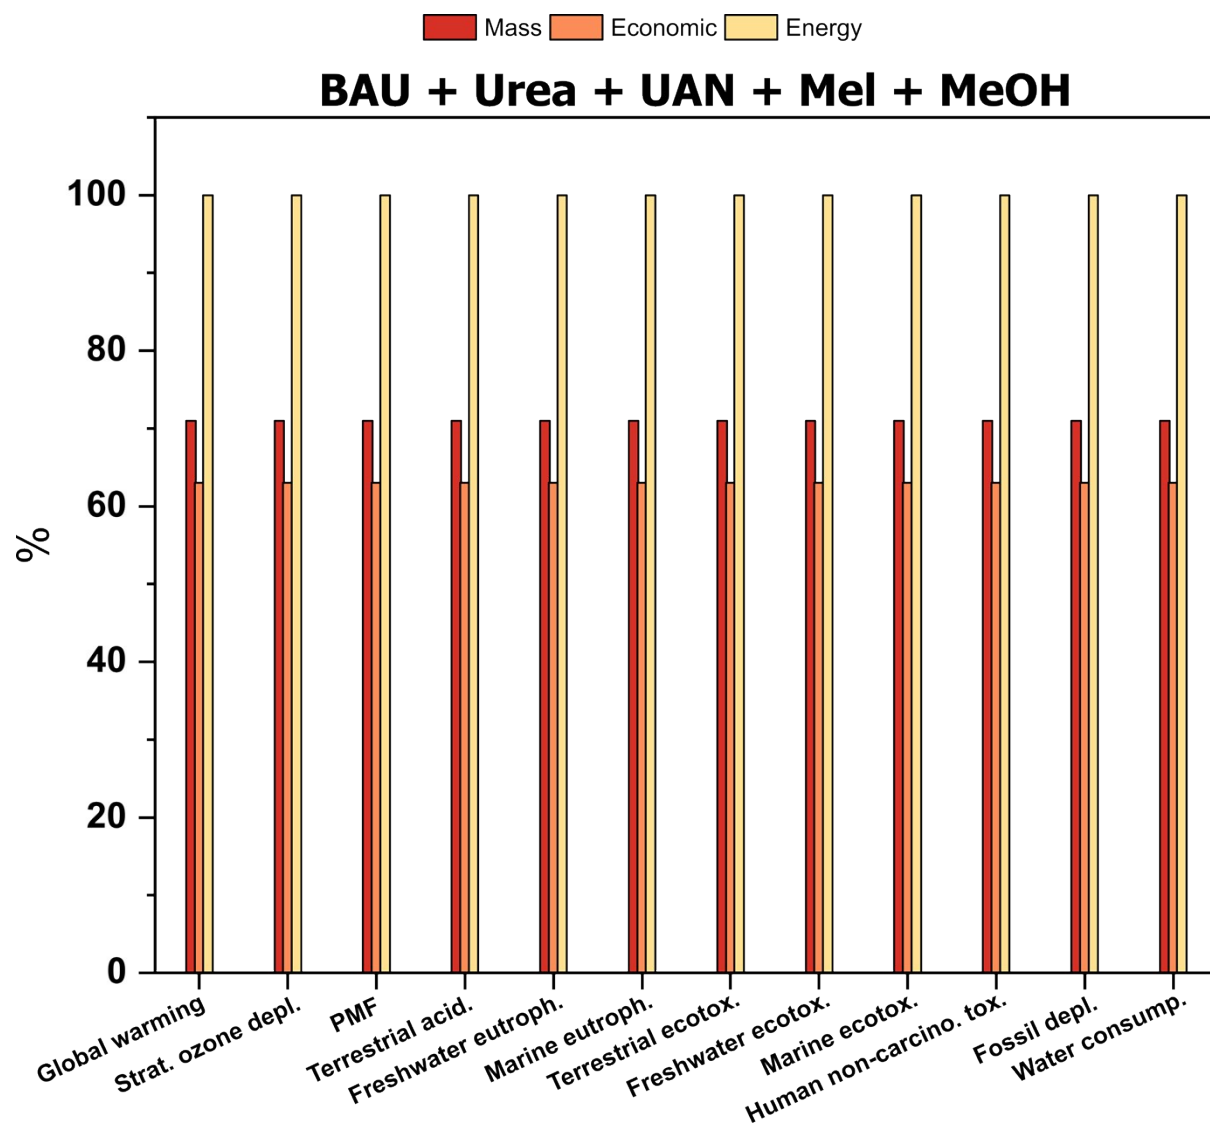

Figure S3: Sensitivity of the LCA methodology (ReCiPe 2016 Midpoint (H) v1.01) of the BAU + Urea + UAN + Mel + MeOH scenario relative to the allocation approach.

## 7.2 Limitations in PB Framework

- The software used to quantify burdens for the PB-LCIA analysis (Ecoinvent database v3.4 on SimaPro v9.0.0.30) has not been updated to reflect the current global industrial policies with respect to halon, HCFC and CFC use<sup>21</sup>. However, in alignment with work by Algunaibet et al.<sup>17</sup>, the burden associated with N<sub>2</sub>O was considered by converting the N<sub>2</sub>O contributions to a CFC-11 equivalent. Consequently, the transgression for each scenario was determined solely based on the N<sub>2</sub>O contributions while halon, HCFC and CFC were excluded given that legislation has restricted the utilization of these specific chemicals with respect to fire extinguishers etc.
- Due to lack of reliable data with respect to land utilization among process industries in Trinidad and Tobago, impacts associated with land system change was neglected from our study.
- Presently, there is no best practice which guides how the share of the safe operating space should be assigned. Furthermore, some sensitivity exists in the selection of sharing principle where one principle can show adherence to the designated share for a given PB while others report transgressions<sup>22</sup>. Acknowledging the lack of guidance in the allocation of shares and with limited availability of global data to consider other sharing principles (such as an egalitarian approach), a status quo approach was considered in this case study<sup>22, 23</sup>.

## 8.0 MeOH Process Description

### 8.1 MeOH Process Description

Aspen Plus® V10 was used to simulate the MeOH process using the process design from our previous work<sup>24</sup>. The model consisted of front end and back end models. Peng- Robinson was selected as the thermodynamic model for all units except for the distillation columns which were modelled using the Vanlaar thermodynamic model. A brief process description is given here.

#### 8.1.1 Front End

Natural gas, steam and combustion air were fed as raw materials for steam methane reforming with captured CO<sub>2</sub> from the ammonia process<sup>25</sup> being blended with the feedstock and syngas to increase MeOH conversion<sup>26-29</sup>. Heavy carbon fractions (C<sub>2</sub>H<sub>6</sub> and C<sub>3</sub>H<sub>8</sub>) were converted to CH<sub>4</sub>,

CO, CO<sub>2</sub> and H<sub>2</sub> in the pre-reforming section according to **Eq. 7 – 10** subsequent to steam reforming **Eq. 9 and 11**. Synthesis gas was then utilized within the back-end model for MeOH production. Heat duties for reforming were met directly using natural gas combustion. The two-stage waste heat recovery implemented consisted of the hot effluent synthesis and flue gases being used for steam generation and to maintain distillation duties.

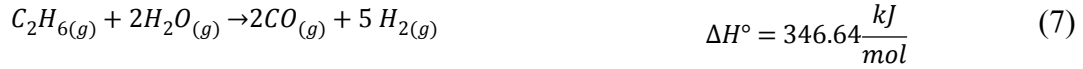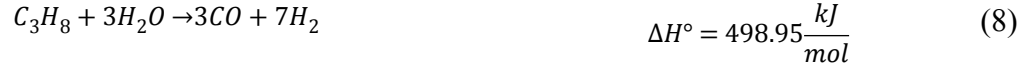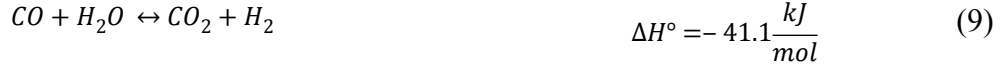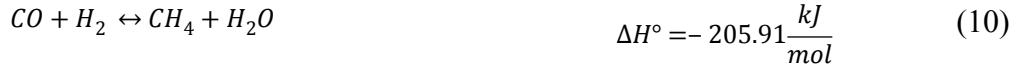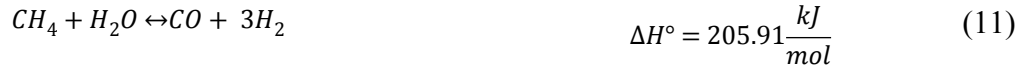

### 8.1.2 Back-end

MeOH synthesis was achieved using two fixed bed tubular reactors arranged in a parallel configuration. Reaction kinetics from Vanden Bussche and Froment<sup>30</sup> were considered for MeOH synthesis (**Eq. 12 and 13**).

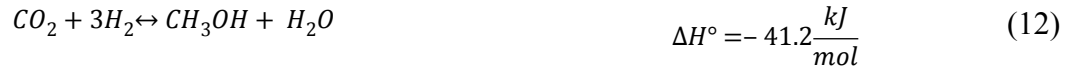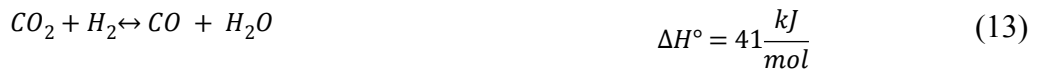

A final MeOH purity of 99.99% was achieved by distillation of the recovered crude MeOH in a topping and refining column.

## 9. Estimation of Scenario Specific Production Rates

Scenario specific production rates were estimated based on functional unit (FU) indicators taken from industrial data<sup>25,31</sup> and literature sources<sup>32-36</sup> (Table S29 and S30). Firstly, the production rates of ammonia, UAN and Mel were retrieved from industrial sources relevant to the Trinidad and Tobago energy sector. From here, production rates for nitric acid (NA), ammonium nitrate (AN) and Urea were estimated from mass balancing in order to meet the raw material needs for UAN and Mel. MeOH flows were estimated based on Aspen Plus simulations in an effort to utilize all remaining CO<sub>2</sub>.

**Table S29: Scenario specific raw material mass balances<sup>1</sup>**

|                                              | Product Flows                |                           |                           |                           |                           |
|----------------------------------------------|------------------------------|---------------------------|---------------------------|---------------------------|---------------------------|
| Normalized Input flows taken from Literature | Urea<br>FU - 1 kg            | UAN<br>FU - 1 tonne       | AN<br>FU - 1 kg           | NA<br>FU - 1 kg           | Mel<br>FU - 1 kg          |
| <i>NH<sub>3</sub> kg</i>                     | <b>0.497<sup>35,36</sup></b> | <b>0.3<sup>34</sup></b>   | <b>0.219<sup>33</sup></b> | <b>0.294<sup>32</sup></b> | -                         |
| <i>Urea kg</i>                               | -                            | <b>327.7<sup>34</sup></b> | -                         | -                         | <b>1.389<sup>32</sup></b> |
| <i>NA kg</i>                                 | -                            | -                         | <b>0.812<sup>33</sup></b> | -                         | -                         |
| <i>AN kg</i>                                 | -                            | <b>425.7<sup>34</sup></b> | -                         | -                         | -                         |
| <i>CO<sub>2</sub> kg</i>                     | <b>0.733<sup>35,36</sup></b> | -                         | -                         | -                         | -                         |
|                                              |                              |                           |                           |                           |                           |
| <b>Scenario Specific Mass Balance</b>        |                              |                           |                           |                           |                           |
| <b>Production flows tonne/day</b>            | <b>1667.65</b>               | <b>4326<sup>31</sup></b>  | <b>1841.58</b>            | <b>1495.36</b>            | <b>180<sup>31</sup></b>   |
| <i>NH<sub>3</sub> tonne/day</i>              | <b>828.82</b>                | <b>1.298</b>              | <b>403.306</b>            | <b>439.636</b>            | -                         |
| <i>Urea tonne/day</i>                        | -                            | <b>1417.63</b>            | -                         | -                         | <b>250.02</b>             |
| <i>NA tonne/day</i>                          | -                            | -                         | <b>1495.36</b>            | -                         | -                         |
| <i>AN tonne/day</i>                          | -                            | <b>1841.58</b>            | -                         | -                         | -                         |
| <i>CO<sub>2</sub> tonne/day</i>              | <b>1222.388</b>              | -                         | -                         | -                         | -                         |

<sup>1</sup>Specified flows recorded in **bold**, calculated raw material flows recorded in **blue**, calculated product flows recorded in **red**. Reference to literature is given as superscript.

**Sample Calculations: Overall mass balance on UAN.**

Based on the normalized input flows for UAN, approximately 327.7 kg Urea/tonne UAN and 425.7 kg AN/tonne UAN is required.

$$\frac{327.7 \text{ kg Urea}}{\text{tonne UAN}} \times \frac{4326 \text{ tonne UAN}}{\text{day}} \times \frac{1 \text{ tonne}}{1000 \text{ kg}} = \mathbf{1417.63 \text{ tonne/day.}}$$

$$\frac{425.7 \text{ kg AN}}{\text{tonne UAN}} \times \frac{4326 \text{ tonne UAN}}{\text{day}} \times \frac{1 \text{ tonne}}{1000 \text{ kg}} = \mathbf{1841.57 \text{ tonne/day.}}$$

**Table S30: Overall mass balances for full inclusion of all processes: BAU + Urea + UAN+ Mel +MeOH**

| <b>Material Flows</b>           | <b>Produced</b>          | <b>Used</b>     | <b>Excess</b> | <b>Comments</b>                                                                                                                                                                                   |
|---------------------------------|--------------------------|-----------------|---------------|---------------------------------------------------------------------------------------------------------------------------------------------------------------------------------------------------|
| <i>NH<sub>3</sub> tonne/day</i> | <b>1850<sup>25</sup></b> | <b>1673.06</b>  | <b>176.94</b> | In alignment with the aim of our study, NH <sub>3</sub> is produced alongside Urea, UAN, Mel and MeOH, in accordance with the operations of the Trinidad and Tobago Energy sector <sup>31</sup> . |
| <i>Urea tonne/day</i>           | <b>1667.65</b>           | <b>1667.65</b>  | <b>0</b>      | BAU + Urea : Urea production = 1667.65 tonne/day<br>BAU + Urea + Mel: Urea production = 1417.63 tonne/day                                                                                         |
| <i>NA tonne/day</i>             | <b>1495.36</b>           | <b>1495.36</b>  | <b>0</b>      | All NA used to produce UAN.                                                                                                                                                                       |
| <i>AN tonne/day</i>             | <b>1841.578</b>          | <b>1841.578</b> | <b>0</b>      | All AN used to produce UAN.                                                                                                                                                                       |
| <i>CO<sub>2</sub> tonne/day</i> | <b>2250</b>              | <b>2250</b>     | <b>0</b>      | Excess CO <sub>2</sub> quota of 1027.612 tonne/day exported to MeOH <sup>24</sup> . Total production rate for MeOH supporting full utilization = 5027 tonne/day                                   |
| <i>Mel tonne/day</i>            | <b>180</b>               | <b>0</b>        | <b>180</b>    | -                                                                                                                                                                                                 |
| <i>UAN tonne/day</i>            | <b>4326</b>              | <b>0</b>        | <b>4326</b>   | -                                                                                                                                                                                                 |

## 9.0 References

1. S. O. Santos, G. Collodi, G. Azzaro and N. Ferrari, *Techno-economic evaluation of HYCO plant integrated to Ammonia/Urea or Methanol production with CCS*, IEA Greenhouse Gas R&D Programme. Report number 2017-03, 2017.
2. T. Brown, *Ammonia plant cost comparisons: Natural gas, coal, or electrolysis?*, <https://ammoniaindustry.com/ammonia-plant-cost-comparisons-natural-gas-coal-or-electrolysis/>, (accessed January 2020).
3. Chemicals Technology, *QAFCO Melamine plant*, <https://www.chemicals-technology.com/projects/qafcoplant/>, (accessed January 2020).
4. U. Turaga, *Small-scale methanol technologies offer flexibility, cost effectiveness*, <http://www.gasprocessingnews.com/features/201510/small-scale-methanol-technologies-offer-flexibility,-cost-effectiveness.aspx>, (accessed January 2020).
5. W. Conroy, *Poland's ZAP to build 365000 tonne/year nitric acid plant*, <https://www.icis.com/explore/resources/news/2017/04/25/10100367/poland-s-zap-to-build-365-000-tonne-year-nitric-acid-plant/>, (accessed May, 2020).
6. R. W. Whitesides, *Process equipment cost estimating by ratio and proportion*, <https://www.pdhonline.com/courses/g127/g127content.pdf>, (accessed January 2020).
7. Economic Indicators. *Chem. Eng.*, 2010, **117(4)**, 80.
8. Economic Indicators. *Chem. Eng.*, 2016, **123(4)**, 96.
9. Economic Indicators. *Chem. Eng.*, 2017, **124(6)**, 80.
10. Economic Indicators. *Chem. Eng.*, 2019, **126(4)**, 60.
11. R. K. Sinnott and G. Towler, *Coulson & Richardson's Chemical Engineering: Chemical Engineering Design*, Elsevier, 2019.
12. R. Turton, J. A. Shaeiwitz, D. Bhattacharyya and W. B. Whiting, *Analysis, Synthesis, and Design of Chemical Processes*, Prentice Hall, 2018.
13. Trinidad and Tobago Electricity Commission, *Summary of electricity rates*, <https://ttec.co.tt/default/wp-content/uploads/2015/08/Tariffs.pdf>, (accessed January 2020).
14. A. Makhlof, T. Serradj and H. Cheniti, *Environ. Impact Assess. Rev.*, 2015, **50**, 35-41.



15. M. A. Ahmadi, in *Fundamentals of Enhanced Oil and Gas Recovery from Conventional and Unconventional Reservoirs*, ed. A. Bahadori, Gulf Professional Publishing, 2018, DOI: <https://doi.org/10.1016/B978-0-12-813027-8.00009-6>, pp. 269-290.
16. M. W. Ryberg, M. Owsianiak, K. Richardson and M. Z. Hauschild, *Ecol. Indic.*, 2018, **88**, 250-262.
17. I. M. Algunaibet, C. Pozo, Á. Galán-Martín, M. A. J. Huijbregts, N. Mac Dowell and G. Guillén-Gosálbez, *Energy Environ. Sci.*, 2019, **12**, 1890-1900.
18. D. F. Rodríguez-Vallejo, G. Guillén-Gosálbez and B. Chachuat, *ACS Sustainable Chem. Eng.*, 2020, **8 (8)**, 3072 - 3081.
19. S. Farzad, M. A. Mandegari, M. Guo, K. F. Haigh, N. Shah and J. F. Görgens, *Biotechnol. Biofuels*, 2017, **10**, 87.
20. A. Durkin, I. Tapygin, Q. Kong, M. F. M. Gunam Resul, A. Rehman, A. M. L. Fernández, A. P. Harvey, N. Shah and M. Guo, *ChemistryOpen*, 2019, **8 (6)**, 668 - 688.
21. François, *Halon 1301 emissions in petroleum, gas and uranium datasets*, <https://www.ecoinvent.org/support/ecoinvent-forum/topic.html?&tid=279>, (accessed December 2019).
22. M. W. Ryberg, M. Owsianiak, J. Clavreul, C. Mueller, S. Sim, H. King and M. Z. Hauschild, *Sci. Total Environ.*, 2018, **634**, 1406-1416.
23. A. González-Garay, M. S. Frei, A. Al-Qahtani, C. Mondelli, G. Guillén-Gosálbez and J. Pérez-Ramírez, *Energy Environ. Sci.*, 2019, **12**, 3425-3436.
24. C. Jaggai, Z. Imkaraaz, K. Sann, A. Pounder, N. Koylass, D. P. Chakrabarti, M. Guo and K. Ward, *Green Chem.*, 2020, **22**, 4279-4294
25. S. Sadeek, T. Lee Chan, R. Ramdath, A. Rajkumar, M. Guo and K. Ward, *Chem. Eng. Res. Des.*, 2020, **158**, 177-192.
26. S. Reddy, M. Bhakta, J. Gilmartin and J. Yonkoski, *Energy Procedia*, 2014, **63**, 1407-1414.
27. G. Leonzio, *Processes*, 2018, **6(3)**, 20.
28. I. L. Wiesberg, J. L. de Medeiros, R. M. B. Alves, P. L. A. Coutinho and O. Q. F. Araújo, *Energy Convers. Manage.*, 2016, **125**, 320-335.
29. G. Collodi, G. Azzaro, N. Ferrari and S. Santos, *Energy Procedia*, 2017, **114**, 122-138.
30. K. M. Vanden Bussche and G. F. Froment, *J. Catal.*, 1996, **161(1)**, 1-10.

31. Ministry of Energy and Energy Industries – UAN & Melamine, <http://www.energy.gov.tt/our-business/lng-petrochemicals/petrochemicals/uan-malamine/> (accessed June 2020).
32. H. Althaus, M. Chudacoff, S. Hellweg, R. Hischier, N. Jungbluth, M. Osses and A. Primas, *Life cycle inventories of chemicals data v2.0*, Swiss Centre for Life Cycle Inventories, Ecoinvent Report No. 8, v2.0, 2007.
33. Kongshaug G., *Energy Consumption and Greenhouse Gas Emissions in Fertilizer Production. Hydro Agri Europe, Norway*. EFMA Seminar on EU Legislation and the Legislation Process in the EU relative to Fertilizer, Prague, 1998.
34. EFMA, *Best available techniques for pollution prevention and control in the european fertilizer industry - Production of urea and urea ammonium nitrate*, Belgium, 2000.
35. T. Nemecek and T. Kägi, *Life cycle inventories of agricultural production systems v2.0*, Swiss Centre for Life Cycle Inventories, Ecoinvent Report No. 15, v2.0, 2007.
36. J. Davis, *Life cycle inventory (LCI) of fertiliser production : fertiliser products used in Sweden and Western Europe*, SIK Institutet för livsmedel och bioteknik, Göteborg, Sverige , 1999.
